# Supplementary material for: Stereoselective synthesis of complex polycyclic aziridines: use of the Brønsted acid-catalyzed aza-Darzens reaction to prepare an orthogonally protected mitomycin C intermediate with maximal convergency
Source: Royal Society of Chemistry journal article supplement (doi:10.1039/c0cc05734g), 2011-01-01
Supplement: c0cc05734g.pdf [file c0cc05734g.pdf]

## Stereoselective Synthesis of Complex Polycyclic Aziridines: Use of the Brønsted Acid-Catalyzed aza-Darzens Reaction to Prepare an Orthogonally Protected Mitomycin C Intermediate with Maximal Convergence

Jayasree M. Srinivasan, Priya A. Mathew, Amie L. Williams, John C. Huffman and Jeffrey N. Johnston\*

Department of Chemistry & Vanderbilt Institute of Chemical Biology  
Vanderbilt University  
2301 Vanderbilt Place, Nashville, TN 37235-1822  
and  
Indiana University Molecular Structure Center, Bloomington, IN 47405

|                                                                                                  | S-I-X |
|--------------------------------------------------------------------------------------------------|-------|
| Experimental Section.....                                                                        | 1     |
| ( <i>E</i> )-1,1-Diphenyl- <i>N</i> -(3-(triphenylsilyl)prop-2-ynylidene)methanamine (4).....    | 2     |
| Ethyl-1-benzhydryl-3-((triphenylsilyl)ethynyl)aziridine-2-carboxylate (5).....                   | 2     |
| 1-Benzhydryl-3-ethynylaziridine-2-carboxylic acid (S1).....                                      | 3     |
| 1-Benzhydryl-3-ethynylaziridine-2-carboxylic acid benzhydryl amide (6).....                      | 3     |
| Benzhydryl-(1-benzhydryl-3-ethynylaziridin-2-ylmethyl) amine (7).....                            | 4     |
| <i>N,O</i> -Ketal (11).....                                                                      | 4     |
| Structural Assignment of <i>N,O</i> -ketal 11.....                                               | 4     |
| Benzoyl <i>N,O</i> -ketal (S2).....                                                              | 5     |
| Chloro <i>N,O</i> -ketal (12).....                                                               | 5     |
| Deuterodiphenyl methylamine (S3).....                                                            | 6     |
| <i>N</i> ,1-Dibenzhydryl-3-ethynylaziridine-2-deuterocarboxamide (S4).....                       | 6     |
| <i>N</i> -((1-Benzhydryl-3-ethynylaziridin-2-yl)methyl)-1,1-deuterodiphenylmethanamine (13)..... | 6     |
| Deutero <i>N,O</i> -ketal 14.....                                                                | 7     |

### Experimental Section

Flame-dried (under vacuum) glassware was used for all reactions. All reagents and solvents were commercial grade and purified prior to use when necessary. Diethyl ether (Et<sub>2</sub>O), tetrahydrofuran (THF), dichloromethane (CH<sub>2</sub>Cl<sub>2</sub>), and benzene (C<sub>6</sub>H<sub>6</sub>) were dried by passage through a column of activated alumina as described by Grubbs.<sup>1</sup> Benzene was additionally passed through a column containing activated Q-5 reactant. Flash column chromatography was performed using Sorbent Technologies 40-63 mm, pore size 60 Å silica gel with solvent systems indicated. Analytical thin layer column chromatography was performed using Sorbent Technologies 250 mm glass-backed UV254 silica gel plates that were visualized by fluorescence upon 250 nm radiation and/or the by use of ceric ammonium molybdate, ninhydrin, *p*-anisaldehyde and potassium permanganate. Solvent removal was effected by rotary evaporation under vacuum (~ 25-40 mm Hg). IR spectra were recorded on a Nicolet Avatar 360 spectrophotometer and are reported in wavenumbers (cm<sup>-1</sup>). Liquids and oils were analyzed as neat films on a NaCl plate (transmission), whereas solids were applied to a diamond plate (ATR).

Nuclear magnetic resonance spectra (NMR) were acquired on a Varian INOVA-400 (400 MHz), VXR-400 (400 MHz), INOVA-500 (500 MHz), BRUKER DRX-500 (500 MHz), BRUKER DRX-600 (600 MHz), Bruker AV-400 (400 MHz) or Bruker AV II-600 (600 MHz) spectrometers. All chemical shifts were measured relative to residual solvent peaks as an internal standard set to δ 7.26 and δ 77.1 (CDCl<sub>3</sub>), unless otherwise specified.

<sup>1</sup> A. B. Pangborn, M. A. Giardello, R. H. Grubbs, R. K. Rosen, F. J. Timmers, *Organometallics* 1996, **15**, 1518.

Johnston *et al.*

Supporting Information

Mass spectra were recorded on a Kratos MS-80 spectrometer by use of the ionization techniques specified (CI, EI or ESI). Ratios of diastereomers and isomeric products were measured directly from integration of  $^1\text{H}$  NMR absorptions of protons common to the components.

3-(Triphenylsilyl)prop-2-yn-1-ol and 3-(triphenylsilyl)propionaldehyde were prepared according to literature procedures,<sup>2</sup> and matched previously reported spectral data.<sup>3</sup>

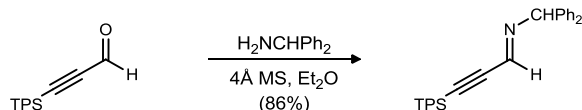

**(E)-1,1-Diphenyl-N-(3-(triphenylsilyl)prop-2-ynylidene)methanamine (4).** The alkynyl aldehyde (0.51 g, 1.6 mmol) and 4 Å molecular sieves were stirred in diethyl ether (20 mL). Diphenylmethyl amine (280  $\mu\text{L}$ , 1.63 mmol) was then added and the mixture was stirred until  $^1\text{H}$  NMR spectroscopy of an aliquot revealed complete aldehyde consumption. The mixture was filtered, dichloromethane was added to the filter cake to dissolve the white solid and the mixture was refiltered. The solvent was removed and the product (488 mg) was precipitated by the addition of a few drops of diethyl ether and hexanes, as a white solid as the *E*-isomer. The mother liquor was purified by flash chromatography ( $\text{Al}_2\text{O}_3$ , 10% ethyl acetate in hexanes) to afford the remainder of the aldimine (total yield: 678 mg, 86%).  $R_f = 0.50$  (20% EtOAc/hexanes); IR (film) 3068, 3025, 2852, 1607, 1430, 1114  $\text{cm}^{-1}$ ;  $^1\text{H}$  NMR (400 MHz,  $\text{CDCl}_3$ )  $\delta$  7.78 (s, 1H), 7.67 (d,  $J = 6.6$  Hz, 6H), 7.46-7.25 (m, 19H), 5.54 (s, 1H);  $^{13}\text{C}$  NMR (100 MHz,  $\text{CDCl}_3$ ) ppm 145.3, 142.5, 135.8, 132.4, 130.3, 128.7, 128.3, 128.2, 127.9, 127.8, 127.5, 105.3, 94.3, 78.9; HRMS (EI): Exact mass calcd for  $\text{C}_{34}\text{H}_{28}\text{NSi}$   $[\text{M}+\text{H}]^+$  478.1986, found 478.1973.

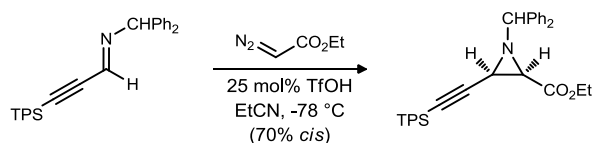

**Ethyl-1-benzhydryl-3-((triphenylsilyl)ethynyl)aziridine-2-carboxylate (5).** To a propionitrile solution (5 mL) of the aldimine (0.50 g, 1.1 mmol) at  $-78$  °C was added triflic acid (23.5  $\mu\text{L}$ , 293  $\mu\text{mol}$ ). After 5 min, ethyl diazoacetate (132  $\mu\text{L}$ , 1.26 mmol) was added dropwise to the cold solution. The mixture was stirred at  $-78$  °C for 6 h, and then quenched by the addition of a satd aq  $\text{NaHCO}_3$  solution (5 mL). The layers were separated and the aqueous layer was extracted with ethyl acetate. The combined organic layers were dried ( $\text{Na}_2\text{SO}_4$ ), filtered, and concentrated to give the crude product (4.4:1 of *cis:trans*,  $^1\text{H}$  NMR). The addition of a few drops of dichloromethane and hexanes precipitated the *cis*-aziridine as a white solid (302 mg). The mother liquor was purified by flash chromatography ( $\text{SiO}_2$ , 0-20% ethyl acetate in hexanes) to afford an additional 112 mg of the *cis*-isomer and 108 mg pure *trans*-isomer. *cis*: 414 mg (70%);  $R_f = 0.38$  (20% EtOAc/hexanes); IR (film) 3068, 2982, 2177, 1752, 1430, 1188, 1113  $\text{cm}^{-1}$ ;  $^1\text{H}$  NMR (400 MHz,  $\text{CDCl}_3$ )  $\delta$  7.65-7.63 (m, 6H), 7.54 (d,  $J = 7.3$  Hz, 2H), 7.47-7.23 (m, 17H), 4.20-4.01 (m, 2H), 3.99 (s, 1H), 2.64 (d,  $J = 6.4$  Hz, 2H), 1.11 (t,  $J = 7.2$  Hz, 3H).  $^{13}\text{C}$  NMR (100 MHz,  $\text{CDCl}_3$ ) ppm 167.3, 153.1, 141.8, 135.7, 133.3, 130.0, 128.7, 128.6, 128.0, 127.60.

<sup>2</sup> J. R. Hwu, P. S. Furth, *J. Am. Chem. Soc.* 1989, **111**, 8834.

<sup>3</sup> 3-(triphenylsilyl)prop-2-yn-1-ol: S. Morikawa, S. Yamazaki, M. Tsukada, S. Izuhara, T. Morimoto, K. Kakiuchi, *J. Org. Chem.* 2007, **72**, 6459; 3-(triphenylsilyl)propionaldehyde: E. V. Arshavskaya, L. D. Lezhava, A. M. Sladkov, *B. Acad. Sci. USSR CH+* 1979, 200.

Johnston *et al.*

Supporting Information

127.59, 127.5, 105.1, 83.2, 77.1, 61.4, 45.0, 34.7, 14.3; HRMS (EI): Exact mass calcd for  $C_{38}H_{34}NO_2Si$   $[M+H]^+$  564.2353, found 564.2358. *trans*: 108 mg (18%);  $R_f = 0.43$  (20% EtOAc/hexanes); IR (film) 3068, 2980, 2172, 1742, 1429, 1187, 1114  $cm^{-1}$ ;  $^1H$  NMR (400 MHz,  $CDCl_3$ )  $\delta$  7.55-7.53 (m, 6H), 7.45-7.43 (m, 2H), 7.40-7.15 (m, 17H), 4.54 (s, 1H), 4.21-4.10 (m, 2H), 3.29 (d,  $J = 2.8$  Hz, 1H), 2.58 (d,  $J = 2.6$  Hz, 1H), 1.24 (t,  $J = 7.2$  Hz, 3H).  $^{13}C$  NMR (100 MHz,  $CDCl_3$ ) ppm 168.8, 142.8, 141.4, 135.7, 132.9, 130.2, 128.7, 128.4, 128.2, 127.6, 127.4, 127.1, 104.3, 86.0, 71.4, 61.5, 45.7, 34.8, 14.2; HRMS (EI): Exact mass calcd for  $C_{38}H_{34}NO_2Si$   $[M+H]^+$  564.2353, found 564.2342.

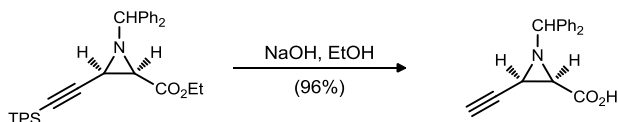

**1-Benzhydryl-3-ethynylaziridine-2-carboxylic acid (S1).** The ethyl ester (14.3 g, 25.4 mmol) in 95% aqueous ethanol (300 mL) was treated with sodium hydroxide (2.0 g, 51 mmol) and the suspension was stirred overnight. Ethanol was evaporated, water was added and the aqueous layer was washed with diethyl ether. The aqueous layer was acidified to  $pH < 2$  with aq 1N hydrochloric acid, and the resulting solid was dissolved in dichloromethane. The organic layer was separated, dried ( $Na_2SO_4$ ), filtered and the solvent was removed to afford the alkynyl carboxylic acid as a white solid (6.7 g, 96% yield). mp 136.5-138  $^{\circ}C$ ;  $R_f = 0.09$  (40% EtOAc/hexanes); IR (film) 3288, 3090, 3061, 3029, 1718, 1700, 1498, 1454, 1247, 1063  $cm^{-1}$ ;  $^1H$  NMR (400 MHz,  $CDCl_3$ )  $\delta$  7.45 (d,  $J = 7.4$  Hz, 2H), 7.40-7.28 (m, 8H), 3.97 (s, 1H), 2.75 (d,  $J = 6.6$  Hz, 1H), 2.71 (dd,  $J = 6.6, 1.5$  Hz, 1H), 2.29 (d,  $J = 1.5$  Hz, 1H) (*OH* not observed);  $^{13}C$  NMR (100 MHz,  $CDCl_3$ ) ppm 168.9, 141.0, 140.9, 129.2, 129.0, 128.4, 128.0, 127.6, 127.3, 77.7, 76.4, 72.5, 44.4, 34.5; HRMS (EI) Exact mass calcd for  $C_{18}H_{14}NO_2$   $[M-H]^+$  276.1025, found 276.1034.

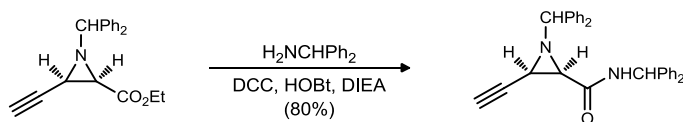

**1-Benzhydryl-3-ethynylaziridine-2-carboxylic acid benzhydryl amide (6).** The carboxylic acid (1.3 g, 3.7 mmol), 1,3-dicyclohexylcarbodiimide (DCC) (1.35 g, 6.56 mmol), and 1-hydroxybenzotriazole (HOBT) (890 mg, 6.56 mmol) were dissolved in dichloromethane (94 mL). Then diisopropylethylamine (0.82 mL, 4.69 mmol) and diphenyl methyl amine (1.13 mL, 6.56 mmol) were added to the solution, and the mixture was stirred at room temperature for 3 days. A 1 M HCl solution was added and the layers were separated. The organic layer was washed with 1 M HCl, brine, and 1 M sodium bicarbonate, and then dried ( $Na_2SO_4$ ), filtered, and concentrated to afford a solid. The crude material was purified by flash column chromatography ( $SiO_2$ , 10-40% ethyl acetate in hexanes) to give an off-white solid (1.68 g, 80%). mp 50-52  $^{\circ}C$ ;  $R_f = 0.34$  (40% EtOAc/hexanes); IR (film) 3390, 3294, 3086, 3061, 2924, 1683, 1515, 1493, 1454  $cm^{-1}$ ;  $^1H$  NMR (400 MHz,  $CDCl_3$ )  $\delta$  7.41 (d,  $J = 7.4$  Hz, 2H), 7.37-7.21 (m, 16H), 7.02-7.00 (m, 2H), 6.20 (d,  $J = 8.9$  Hz, 1H), 3.82 (s, 1H), 2.62 (d,  $J = 6.6$  Hz, 1H), 2.54 (dd,  $J = 6.6, 1.7$  Hz, 1H), 1.92 (d,  $J = 1.7$  Hz, 1H);  $^{13}C$  NMR (100 MHz,  $CDCl_3$ ) ppm 165.8, 141.5, 141.4, 141.2, 141.1, 128.8, 128.6, 128.51, 128.48, 128.4, 128.04, 127.97, 127.6, 127.5, 127.4, 127.3, 127.2, 127.0, 78.6, 76.5, 71.6, 56.1, 45.4, 34.8; HRMS (EI) Exact mass calcd for  $C_{31}H_{26}N_2O$   $[M]^+$  442.2045, found 442.2039.

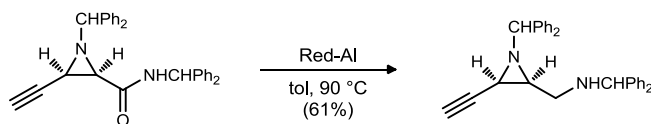

**Benzhydryl-(1-benzhydryl-3-ethynylaziridin-2-ylmethyl) amine (7).** The amide (15.1 mg, 33.8  $\mu\text{mol}$ ) was dissolved in toluene (1.1 mL), then Red-Al (65 % w/v) (105  $\mu\text{L}$ , 33.8  $\mu\text{mol}$ ) was added dropwise (note: reaction bubbled vigorously). The reaction was heated to 90  $^{\circ}\text{C}$  for 4 h, then cooled to rt and quenched by the addition of  $\text{Na}_2\text{SO}_4 \cdot 10\text{H}_2\text{O}$ . The mixture was stirred at rt for 30 min, filtered, and the solvent was removed. The product was purified by flash column chromatography ( $\text{SiO}_2$ , 25-40% ethyl acetate in hexanes) to give a white solid (8.9 mg, 61%). mp 109-111  $^{\circ}\text{C}$ ;  $R_f = 0.51$  (40% EtOAc/hexanes); IR (film) 3286, 3060, 3026, 2850, 1493, 1453, 1029  $\text{cm}^{-1}$ ;  $^1\text{H}$  NMR (400 MHz,  $\text{CDCl}_3$ )  $\delta$  7.47 (d,  $J = 7.2$  Hz, 2H), 7.36-7.30 (m, 4H), 7.26-7.16 (m, 14H), 4.67 (s, 1H), 3.66 (s, 1H), 2.80 (dd,  $J = 12.3, 5.0$  Hz, 1H), 2.68 (dd,  $J = 12.3, 7.1$  Hz, 1H), 2.19 (dd,  $J = 6.2, 1.8$  Hz, 1H), 2.16-2.12 (m, 1H), 2.07 (d,  $J = 1.8$  Hz, 1H) (NH not observed);  $^{13}\text{C}$  NMR (150 MHz,  $\text{CDCl}_3$ ) ppm 144.1, 143.9, 142.9, 142.4, 128.7, 128.5, 128.4, 127.9, 127.7, 127.4, 127.3, 127.2, 127.0, 80.8, 78.0, 70.2, 67.1, 48.0, 45.0, 32.7; HRMS (EI) Exact mass calcd for  $\text{C}_{31}\text{H}_{29}\text{N}_2$   $[\text{M}+\text{H}]^+$  429.2331, found 429.2313.

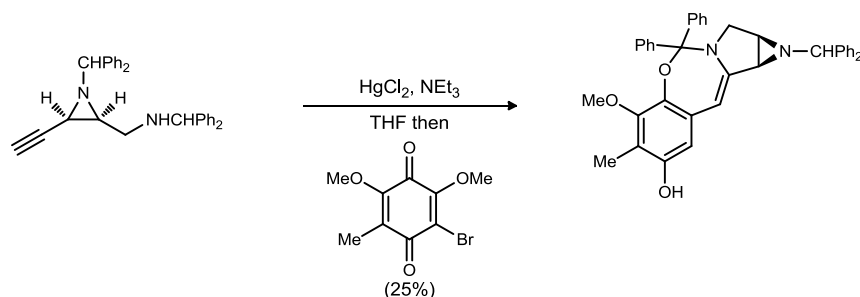

***N,O*-Ketal (11).** The alkyne amine (15 mg, 35  $\mu\text{mol}$ ) and mercuric chloride (7 mg, 27  $\mu\text{mol}$ ) were dissolved in THF (175  $\mu\text{mol}$ ), and treated with triethylamine (25  $\mu\text{L}$ , 18  $\mu\text{mol}$ ). The reaction mixture was stirred for 4 h at rt, then the quinone (9 mg, 35  $\mu\text{mol}$ ) was added and the solution was stirred for an additional 4 h. The solvent was removed and the residue was purified by flash chromatography (neutral alumina, 20-40-80% ethyl acetate in hexanes) afforded the title compound as a green-yellow solid (6 mg, 30%).  $R_f = 0.30$  (30% EtOAc/hexanes); IR (film) 3061, 3028, 2921, 1636, 1577  $\text{cm}^{-1}$ ;  $^1\text{H}$  NMR (400 MHz,  $\text{CDCl}_3$ )  $\delta$  7.61 (d,  $J = 7.4$  Hz, 2H), 7.46 (d,  $J = 7.2$  Hz, 2H), 7.39-7.22 (m, 16 H), 5.90 (s, 1H), 5.19 (s, 1H), 3.91 (s, 3H), 3.76 (s, 1H), 3.17 (dd,  $J = 10.6, 3.4$  Hz, 1H), 3.10 (d,  $J = 10.6$  Hz, 1H), 2.93 (d,  $J = 5.3$  Hz, 1H), 2.61 (dd,  $J = 4.8, 3.6$  Hz, 1H), 2.07 (s, 3H) (OH not observed);  $^{13}\text{C}$  NMR (100 MHz,  $\text{CDCl}_3$ ) ppm 150.9, 149.2, 144.2, 144.0, 143.6, 143.5, 141.7, 139.9, 129.3, 128.6, 128.30, 128.27, 128.2, 127.9, 127.7 (2C), 127.5, 127.3 (2C), 113.5, 108.7, 97.9, 96.8, 74.8, 61.1, 55.7, 50.6, 41.5, 9.1; HRMS (EI): Exact mass calcd for  $\text{C}_{39}\text{H}_{35}\text{N}_2\text{O}_3$   $[\text{M}+\text{H}]^+$  579.2642, found 579.2632.

### Structural Assignment of *N,O*-ketal 11

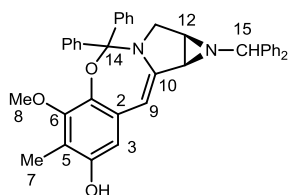

All the 1D and 2D NMR experiments were carried out on a Varian I400 (400 MHz) instrument in  $\text{CDCl}_3$ . The  $^1\text{H}$  NMR experiment confirmed the hydroquinone ring proton  $\text{H}_3$  (5.90 ppm). The corresponding  $^{13}\text{C}$  chemical shift appeared at 108.7 ppm. The enamine olefin proton  $\text{H}_9$  appeared at 5.19 ppm, with the corresponding  $^{13}\text{C}$  chemical shift at 97.9 ppm. The two protons ( $\text{H}_3, \text{H}_9$ ) showed  $^3J_{\text{HC}}$  correlations with each other in a CIGAR experiment. Critically, the *N,O*-ketal carbon ( $\text{C}_{14}$ ) was observed

Johnston *et al.*

Supporting Information

at 96.8 ppm. The aziridine diphenylmethyl methine proton (H<sub>15</sub>) was assigned at 3.76 ppm, based on the <sup>3</sup>J<sub>HC</sub> correlations with the aziridine ring carbons C<sub>11</sub> and C<sub>12</sub>. The absence of peaks in 175-185 ppm region in the <sup>13</sup>C experiment indicated that the quinone ring of the starting material was present in its reduced form. HMQC, CIGAR and COSY experiments allowed assignment of all the other proton and carbon peaks. The presence of only one methoxy group indicated that the Michael reaction occurred with the regiochemistry depicted (i.e. substitution of the methoxy group in preference to the bromide). The loss of bromide was confirmed by mass spectroscopic analysis. The IR experiment revealed the presence of a broad band at ~3300 cm<sup>-1</sup> confirming the presence of the phenol hydroxyl group.

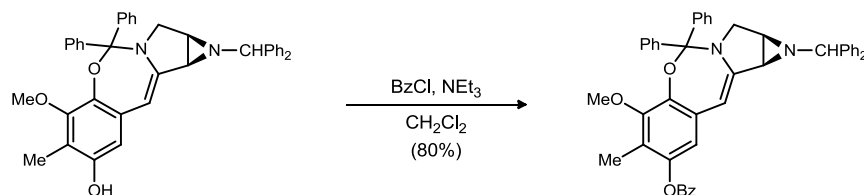

**Benzoyl *N,O*-ketal (S2).** To a solution of the *N,O*-ketal (25 mg, 38 μmol) in dichloromethane (1 mL) was added triethylamine (16 μL, 114 μmol) and benzoyl chloride (8.8 μL, 66 μmol) at 0 °C and stirred for 5 min. The reaction mixture was warmed to room temperature and stirred for an additional 30 min. It was then diluted with dichloromethane (5 mL), washed with water and brine, dried (Na<sub>2</sub>SO<sub>4</sub>), filtered, and then concentrated. The residue was purified via column chromatography (SiO<sub>2</sub>, 0-20% ethyl acetate in hexanes) to afford the benzoate as a white solid (23 mg, 80% yield). R<sub>f</sub> = 0.33 (20% EtOAc/hexanes); IR (film) 3059, 2922, 1732, 1653, 1609, 1444 cm<sup>-1</sup>; <sup>1</sup>H NMR (400 MHz, CDCl<sub>3</sub>) δ 8.14 (d, *J* = 7.6 Hz, 2H), 7.59 (dd, *J* = 15.8, 7.7 Hz, 4H), 7.46 (dd, *J* = 18.7, 7.6 Hz, 4H), 7.38-7.20 (m, 15H), 6.39 (s, 1H), 5.29 (s, 1H), 3.94 (s, 3H), 3.76 (s, 1H), 3.19 (dd, *J* = 10.5, 3.2 Hz, 1H), 3.09 (d, *J* = 10.8 Hz, 1H), 2.95 (d, *J* = 4.9 Hz, 1H), 2.63 (t, *J* = 3.8 Hz, 1H), 2.04 (s, 3H); <sup>13</sup>C NMR (100 MHz, CDCl<sub>3</sub>) ppm 165.0, 150.8, 145.5, 144.7, 144.5, 143.8, 143.6, 143.2, 139.6, 133.5, 130.2, 129.8, 129.2, 128.9, 128.7, 128.3, 128.2, 127.9, 127.6, 127.4, 127.1, 119.3, 115.6, 97.9, 97.0, 74.8, 61.2, 55.7, 50.4, 41.5, 9.9; HRMS (EI): Exact mass calcd for C<sub>46</sub>H<sub>38</sub>N<sub>2</sub>O<sub>4</sub> [M]<sup>+</sup> 682.2832, found 682.2790.

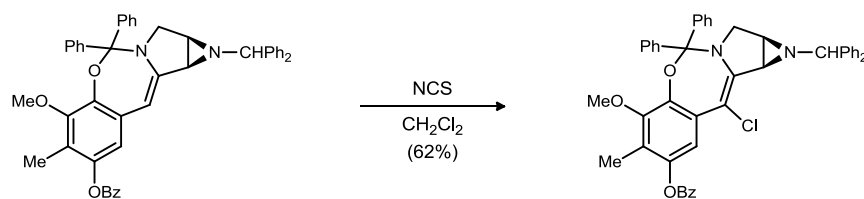

**Chloro *N,O*-ketal (12).** To a solution of the *N,O*-ketal (20 mg, 29 μmol) in dichloromethane (1 mL) was added *N*-chlorosuccinimide (3.5 mg, 29 μmol) and the mixture was stirred for 30 min. The mixture was filtered through a plug of Celite, the solid was washed with dichloromethane, and the filtrate was concentrated. The crude solid was purified via column chromatography (SiO<sub>2</sub>, 0-20% ethyl acetate in hexanes) to afford the chloride as a white crystalline solid (13 mg, 62% yield). R<sub>f</sub> = 0.45 (20% EtOAc/hexanes); IR (film) 3060, 2958, 2923, 2851, 1734, 1595, 1449, 1409, 1095 cm<sup>-1</sup>; <sup>1</sup>H NMR (600 MHz, CDCl<sub>3</sub>) δ 8.14 (d, *J* = 7.1 Hz, 2H), 7.60 (dd, *J* = 7.4, 7.4 Hz, 2H), 7.55 (d, *J* = 7.4 Hz, 2H), 7.47 (dd, *J* = 7.9, 7.7 Hz, 3H), 7.44 (d, *J* = 7.3 Hz, 2H), 7.35-7.28 (m, 9H), 7.25-7.22 (m, 5H), 7.02 (s, 1H), 3.92 (s, 3H), 3.86 (s, 1H), 3.63 (d, *J* = 5.0 Hz, 1H), 3.22 (dd, *J* = 10.7, 3.5 Hz, 1H), 3.18 (d, *J* = 10.7 Hz, 1H), 2.60 (dd, *J* = 4.9, 3.7 Hz, 1H), 2.03 (s, 3H); <sup>13</sup>C NMR (150 MHz, CDCl<sub>3</sub>) ppm 164.9, 150.7, 144.7, 144.6, 143.3, 143.3, 142.7, 138.8, 133.5, 130.2, 129.7, 128.9, 128.6 (2C) 128.5, 128.5 (2C), 128.1, 127.9, 127.7, 127.5, 127.4, 127.3, 127.1, 121.0, 115.0, 102.4, 97.4, 74.7, 61.2, 56.5, 50.8, 40.6, 9.8; HRMS (EI): Exact mass calcd for C<sub>46</sub>H<sub>38</sub>ClN<sub>2</sub>O<sub>4</sub> [M+H]<sup>+</sup> 717.2515, found 717.2305.

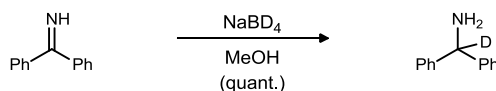

**Deuterodiphenyl methylamine (S3).** To a methanolic solution (3 mL) of the imine (100 mg, 556  $\mu\text{mol}$ ) was added sodium borodeuteride (70 mg, 1.7 mmol), and the mixture was stirred overnight, quenched with water, and then extracted with dichloromethane. The organic layer was dried (Na<sub>2</sub>SO<sub>4</sub>), filtered, and concentrated to afford the deuterioamine as a colorless oil (100 mg, quant).  $R_f = 0.35$  (30% EtOAc/hexanes); IR (film) 3368, 3297, 3020, 1491, 1446  $\text{cm}^{-1}$ ; <sup>1</sup>H NMR (400 MHz, CDCl<sub>3</sub>)  $\delta$  7.41-7.39 (m, 4H), 7.36-7.32 (m, 4H), 7.28-7.23 (m, 2H), 1.83 (s, 2H); <sup>13</sup>C NMR (100 MHz, CDCl<sub>3</sub>) ppm 145.6, 128.6, 127.04, 126.97, 59.4 (t,  $J = 20.7$  Hz); HRMS (EI): Exact mass calcd for C<sub>13</sub>H<sub>12</sub>DN [M]<sup>+</sup> 184.1111, found 184.1101.

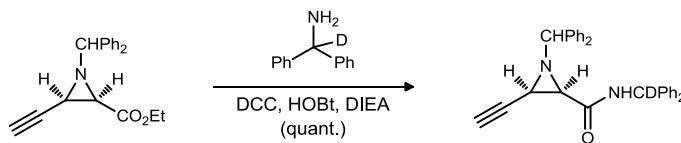

***N*,1-Dibenzhydryl-3-ethynylaziridine-2-deutero-carboxamide (S4).** The carboxylic acid (500 mg, 1.80 mmol), 1,3-dicyclohexylcarbodiimide (DCC) (870 mg, 3.25 mmol), and 1-hydroxybenzotriazole (HOBT) (440 mg, 3.25 mmol) were dissolved in dichloromethane (0.04 M). Diisopropylethylamine (410  $\mu\text{L}$ , 2.35 mmol) and deuterioamine (600  $\mu\text{L}$ , 3.25 mmol) were added to the solution, and the mixture was stirred at room temperature for 24 h. A 1 M HCl solution was added and the layers were separated. The organic layer was washed with 1 M HCl, brine, and 1 M sodium bicarbonate, and then dried (Na<sub>2</sub>SO<sub>4</sub>), filtered, and concentrated. The crude oil was purified by flash column chromatography (Al<sub>2</sub>O<sub>3</sub>, 0-40% ethyl acetate in hexanes) to give the amide as an oil (790 mg, quant).  $R_f = 0.46$  (50% EtOAc/hexanes); IR (film) 3387, 3297, 3059, 1696, 1507, 1496, 1448  $\text{cm}^{-1}$ ; <sup>1</sup>H NMR (400 MHz, CDCl<sub>3</sub>)  $\delta$  7.43 (d,  $J = 7.3$  Hz, 2H), 7.36-7.23 (m, 16H), 7.04-7.02 (m, 2H), 3.84 (s, 1H), 2.64 (d,  $J = 6.6$  Hz, 1H), 2.57 (dd,  $J = 6.6, 1.9$  Hz, 1H), 1.93 (d,  $J = 1.9$  Hz, 1H) (NH not observed); <sup>13</sup>C NMR (100 MHz, CDCl<sub>3</sub>) ppm 165.8, 141.5, 141.4, 141.2, 128.8, 128.6, 128.52, 128.47, 128.40, 128.0, 127.9, 127.6, 127.5, 127.4, 127.3, 127.2, 127.0, 126.94, 126.90, 78.6, 76.4, 71.6, 55.9 (t,  $J = 20.7$  Hz), 45.4, 34.8; HRMS (CI) Exact mass calcd for C<sub>31</sub>H<sub>26</sub>DN<sub>2</sub>O [M+H]<sup>+</sup> 444.2181, found 444.2180.

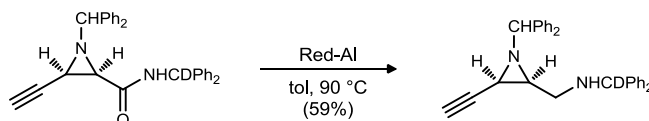

***N*-((1-Benzhydryl-3-ethynylaziridin-2-yl)methyl)-1,1-deuterodiphenylmethanamine (13).** The amide (800 mg, 1.81 mmol) was dissolved in toluene (0.03 M), and then treated with Red-Al (65 % w/v) (1.63 mL, 5.42 mmol) dropwise (note: reaction bubbled vigorously). The reaction was heated to 90 °C for 3 h, then cooled to rt and quenched by the addition of Na<sub>2</sub>SO<sub>4</sub>·10H<sub>2</sub>O. The mixture was stirred at rt for 30 min, filtered through Celite, and concentrated. The product was purified by flash column chromatography (SiO<sub>2</sub>, 0-20% ethyl acetate in hexanes) to give the amine as an oil (462 mg, 59%).  $R_f = 0.37$  (20% EtOAc/hexanes); IR (film) 3288, 3055, 1488, 1448  $\text{cm}^{-1}$ ; <sup>1</sup>H NMR (400 MHz, CDCl<sub>3</sub>)  $\delta$  7.47 (d,  $J = 7.3$  Hz, 2H), 7.36-7.30 (m, 4H), 7.26-7.17 (m, 14H), 3.66 (s, 1H), 2.80 (dd,  $J = 12.3, 5.0$  Hz, 1H), 2.68 (dd,  $J = 12.3, 7.1$  Hz, 1H), 2.19 (dd,  $J = 6.2, 1.6$  Hz,

Johnston *et al.*

Supporting Information

1H), 2.16-2.13 (m, 1H), 2.07 (d,  $J = 1.6$  Hz, 1H) (*NH* not observed);  $^{13}\text{C}$  NMR (100 MHz,  $\text{CDCl}_3$ ) ppm 144.1, 143.9, 142.9, 142.4, 128.7, 128.5, 128.4, 127.9, 127.7, 127.4, 127.3, 127.2, 127.0, 80.8, 78.0, 70.2, 66.7 (t,  $J = 20.8$  Hz), 48.0, 45.0, 32.7; HRMS (EI) Exact mass calcd for  $\text{C}_{31}\text{H}_{28}\text{DN}_2$  [ $\text{M}+\text{H}$ ] $^+$  430.2404, found 430.2395.

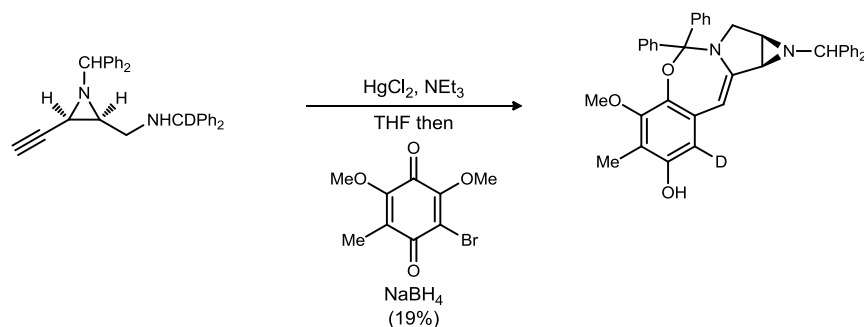

**Deutero *N,O*-ketal 14.** The deuterio amine (150 mg, 349  $\mu\text{mol}$ ) and mercuric chloride (48 mg, 175  $\mu\text{mol}$ ) were dissolved in THF (3 mL), and treated with triethyl amine (292  $\mu\text{L}$ , 2.10 mmol). The reaction mixture was stirred for 90 min at rt, after which quinone (91 mg, 349  $\mu\text{mol}$ ) and sodium borohydride (27 mg, 698  $\mu\text{mol}$ ) were added, and the mixture was stirred overnight. The mixture was filtered through Celite and the solvent was evaporated. Purification by flash chromatography (neutral alumina, 0-40% ethyl acetate in hexanes) afforded the ketal as a colorless oil (39 mg, 19%).  $R_f = 0.18$  (20% EtOAc/hexanes); IR (film) 3361, 2921, 1649, 1446, 1092  $\text{cm}^{-1}$ ;  $^1\text{H}$  NMR (400 MHz,  $\text{CDCl}_3$ )  $\delta$  7.60 (d,  $J = 7.5$  Hz, 2H), 7.45 (d,  $J = 7.4$  Hz, 2H), 7.39-7.22 (m, 16H), 5.22 (s, 1H), 3.91 (s, 3H), 3.76 (s, 1H), 3.19-3.16 (m, 1H), 3.11-3.08 (m, 1H), 2.94 (d,  $J = 4.6$  Hz, 1H), 2.62 (t,  $J = 3.8$  Hz, 1H), 2.07 (s, 3H) (*OH* not observed);  $^{13}\text{C}$  NMR (100 MHz,  $\text{CDCl}_3$ ) ppm 150.9, 149.1, 144.1, 143.9, 143.5, 143.4, 141.6, 139.7, 129.2, 128.6, 128.4, 128.2, 128.1, 127.8, 127.6, 127.4, 127.2, 113.4, 108.5 (t,  $J = 20.7$  Hz), 97.8, 96.7, 74.8, 61.1, 55.7, 50.5, 41.5, 9.0; HRMS (EI): Exact mass calcd for  $\text{C}_{39}\text{H}_{34}\text{DN}_2\text{O}_3$  [ $\text{M}+\text{H}$ ] $^+$  580.2705, found 580.2681.

**Stereoselective Synthesis of Complex Polycyclic Aziridines: Use of the Brønsted Acid-Catalyzed aza-Darzens Reaction to Prepare an Orthogonally Protected Mitomycin C Intermediate with Maximal Convergence**

Jayasree M. Srinivasan, Priya A. Mathew, Amie L. Williams, John C. Huffman and Jeffrey N. Johnston\*

Department of Chemistry & Vanderbilt Institute of Chemical Biology  
Vanderbilt University  
2301 Vanderbilt Place, Nashville, TN 37235-1822  
and  
Indiana University Molecular Structure Center, Bloomington, IN 47405

|                                                               | S-II-X |
|---------------------------------------------------------------|--------|
| Figure 1. $^1\text{H}$ NMR ( $\text{CDCl}_3$ ) of 4.....      | 2      |
| Figure 2. $^{13}\text{C}$ NMR ( $\text{CDCl}_3$ ) of 4.....   | 3      |
| Figure 3. $^1\text{H}$ NMR ( $\text{CDCl}_3$ ) of 5.....      | 4      |
| Figure 4. $^{13}\text{C}$ NMR ( $\text{CDCl}_3$ ) of 5.....   | 5      |
| Figure 5. $^1\text{H}$ NMR ( $\text{CDCl}_3$ ) of S1.....     | 6      |
| Figure 6. $^{13}\text{C}$ NMR ( $\text{CDCl}_3$ ) of S1.....  | 7      |
| Figure 7. $^1\text{H}$ NMR ( $\text{CDCl}_3$ ) of 6.....      | 8      |
| Figure 8. $^{13}\text{C}$ NMR ( $\text{CDCl}_3$ ) of 6.....   | 9      |
| Figure 9. $^1\text{H}$ NMR ( $\text{CDCl}_3$ ) of 7.....      | 10     |
| Figure 10. $^{13}\text{C}$ NMR ( $\text{CDCl}_3$ ) of 7.....  | 11     |
| Figure 11. $^1\text{H}$ NMR ( $\text{CDCl}_3$ ) of 11.....    | 12     |
| Figure 12. $^{13}\text{C}$ NMR ( $\text{CDCl}_3$ ) of 11..... | 13     |
| Figure 13. $^1\text{H}$ NMR ( $\text{CDCl}_3$ ) of S2.....    | 14     |
| Figure 14. $^{13}\text{C}$ NMR ( $\text{CDCl}_3$ ) of S2..... | 15     |
| Figure 15. $^1\text{H}$ NMR ( $\text{CDCl}_3$ ) of 12.....    | 16     |
| Figure 16. $^{13}\text{C}$ NMR ( $\text{CDCl}_3$ ) of 12..... | 17     |
| Figure 17. $^1\text{H}$ NMR ( $\text{CDCl}_3$ ) of S4.....    | 18     |
| Figure 18. $^{13}\text{C}$ NMR ( $\text{CDCl}_3$ ) of S4..... | 19     |
| Figure 19. $^1\text{H}$ NMR ( $\text{CDCl}_3$ ) of 13.....    | 20     |
| Figure 20. $^{13}\text{C}$ NMR ( $\text{CDCl}_3$ ) of 13..... | 21     |
| Figure 21. $^1\text{H}$ NMR ( $\text{CDCl}_3$ ) of 14.....    | 22     |
| Figure 22. $^{13}\text{C}$ NMR ( $\text{CDCl}_3$ ) of 14..... | 23     |
| X-ray Crystal Analysis of 12.....                             | 24     |



Johnston *et al.*

**Figure 1.**  $^1\text{H}$  NMR ( $\text{CDCl}_3$ ) of **4**.

Supporting Information II

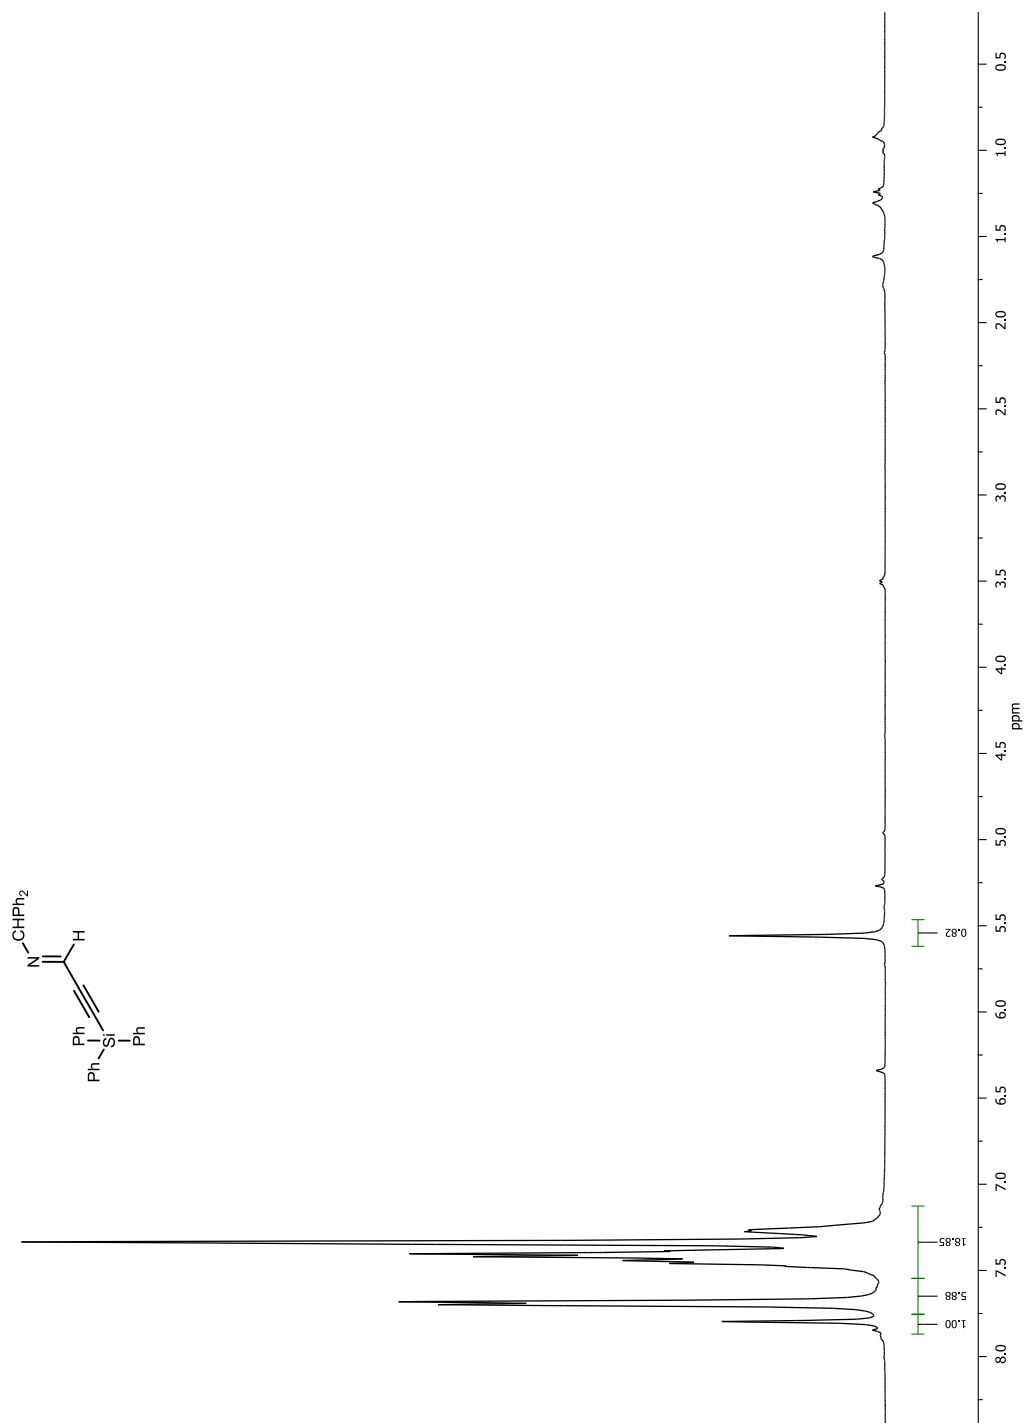

Johnston *et al.*

**Figure 2.**  $^{13}\text{C}$  NMR ( $\text{CDCl}_3$ ) of **4**.

Supporting Information II

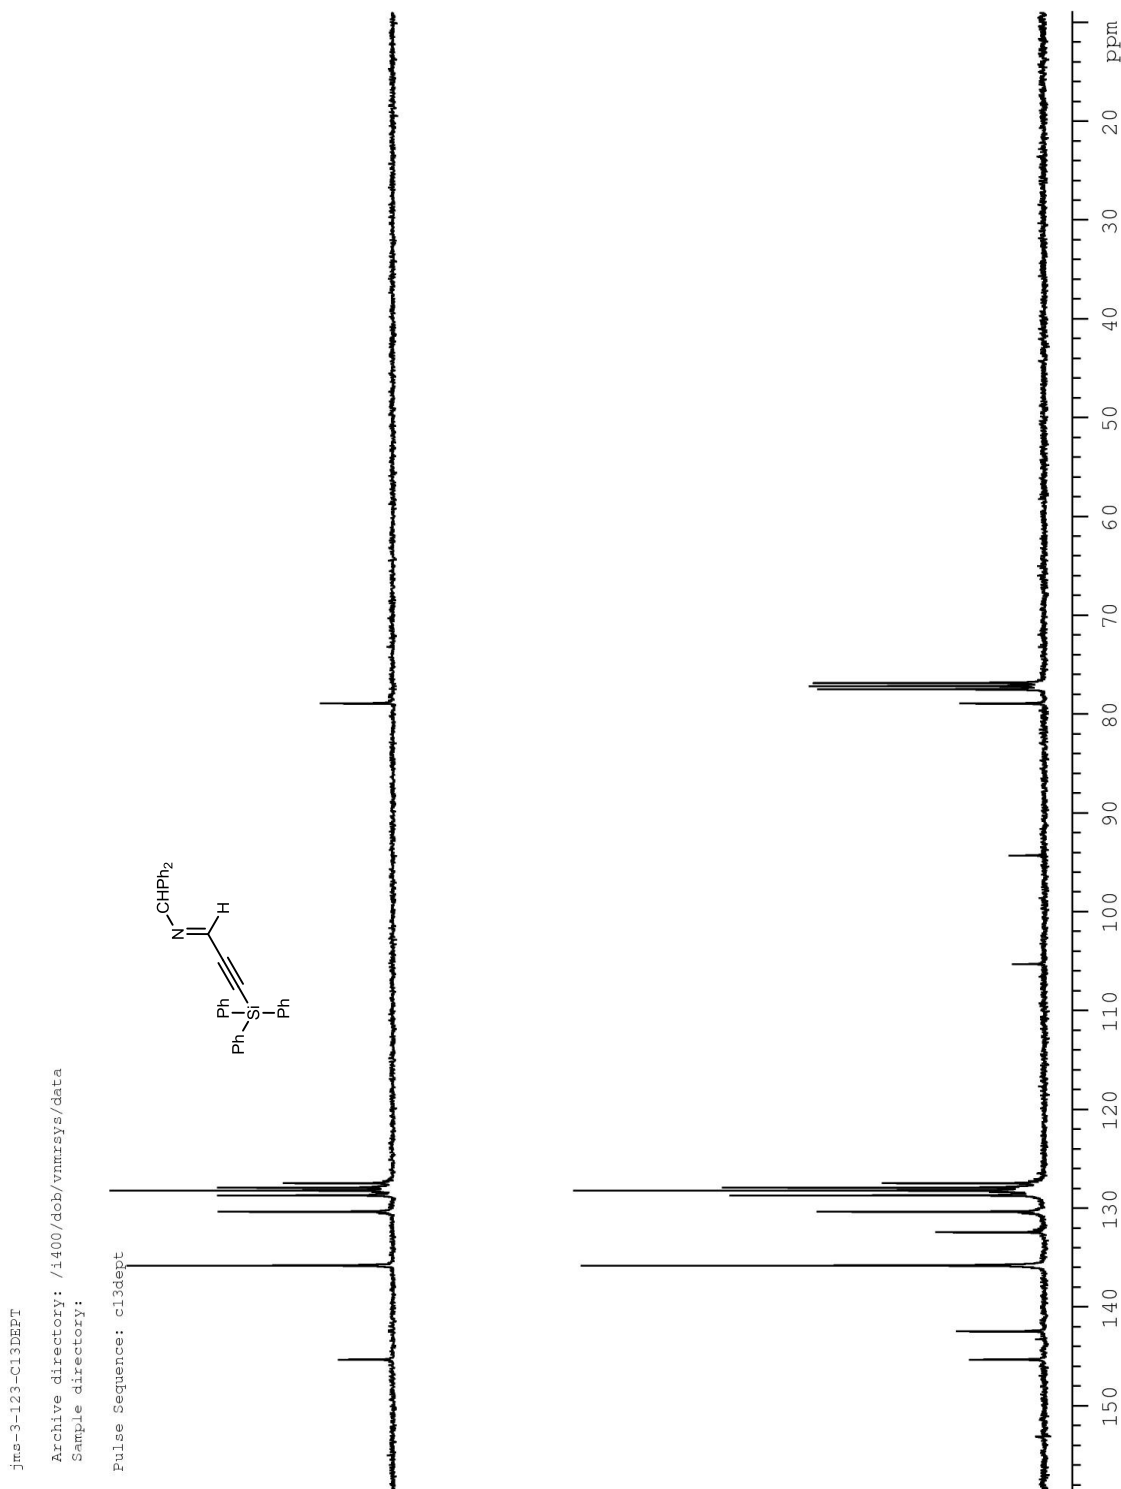

Johnston *et al.*

**Figure 3.**  $^1\text{H}$  NMR ( $\text{CDCl}_3$ ) of **5**.

Supporting Information II

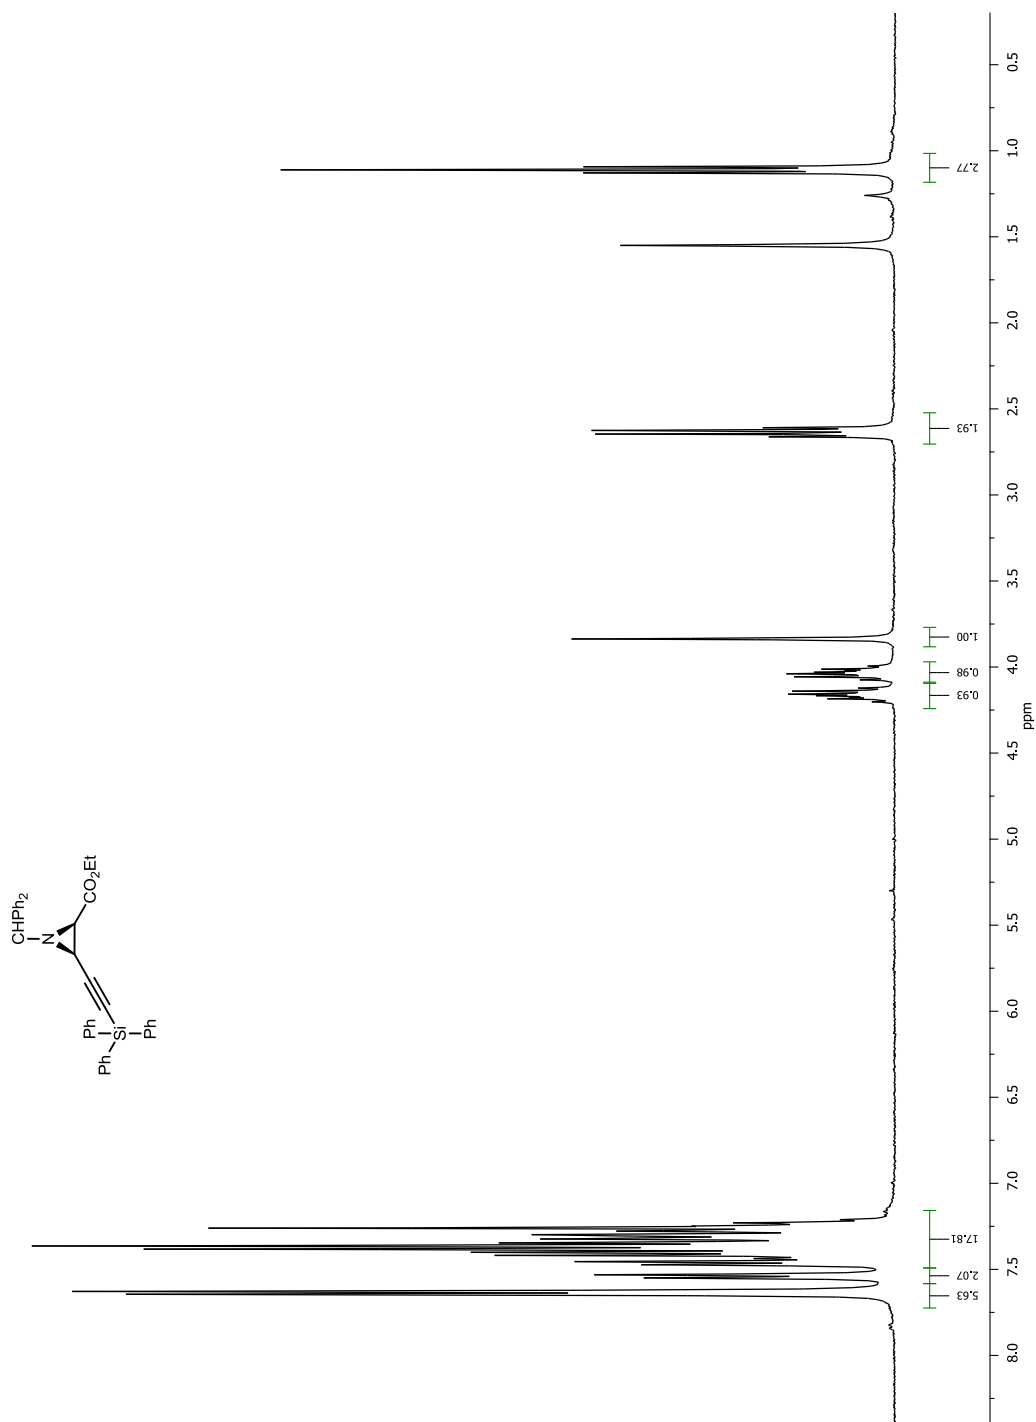

Johnston et al.

Figure 4.  $^{13}\text{C}$  NMR ( $\text{CDCl}_3$ ) of 5.

Supporting Information II

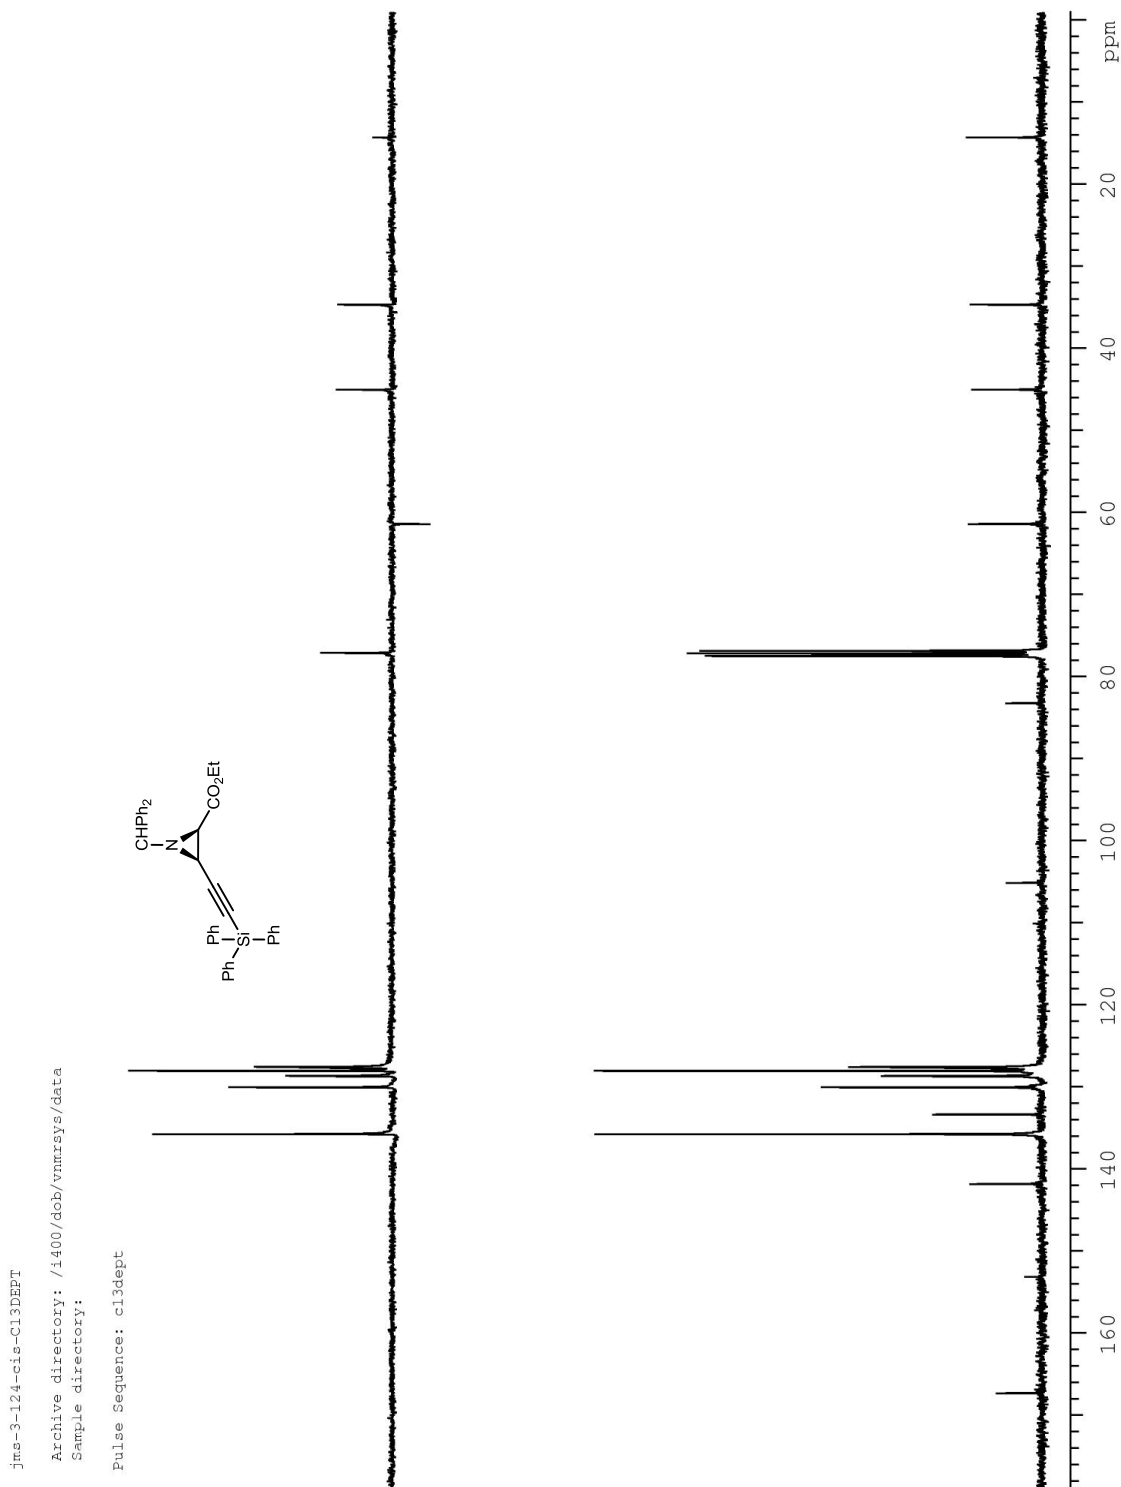

Johnston *et al.*

Supporting Information II

Figure 5.  $^1\text{H}$  NMR ( $\text{CDCl}_3$ ) of S1.

alw4.130.1a

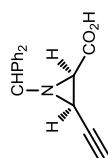

NAME  
EXPNO  
PROCNO

|          |
|----------|
| ALW4-130 |
| 1        |
| 1        |

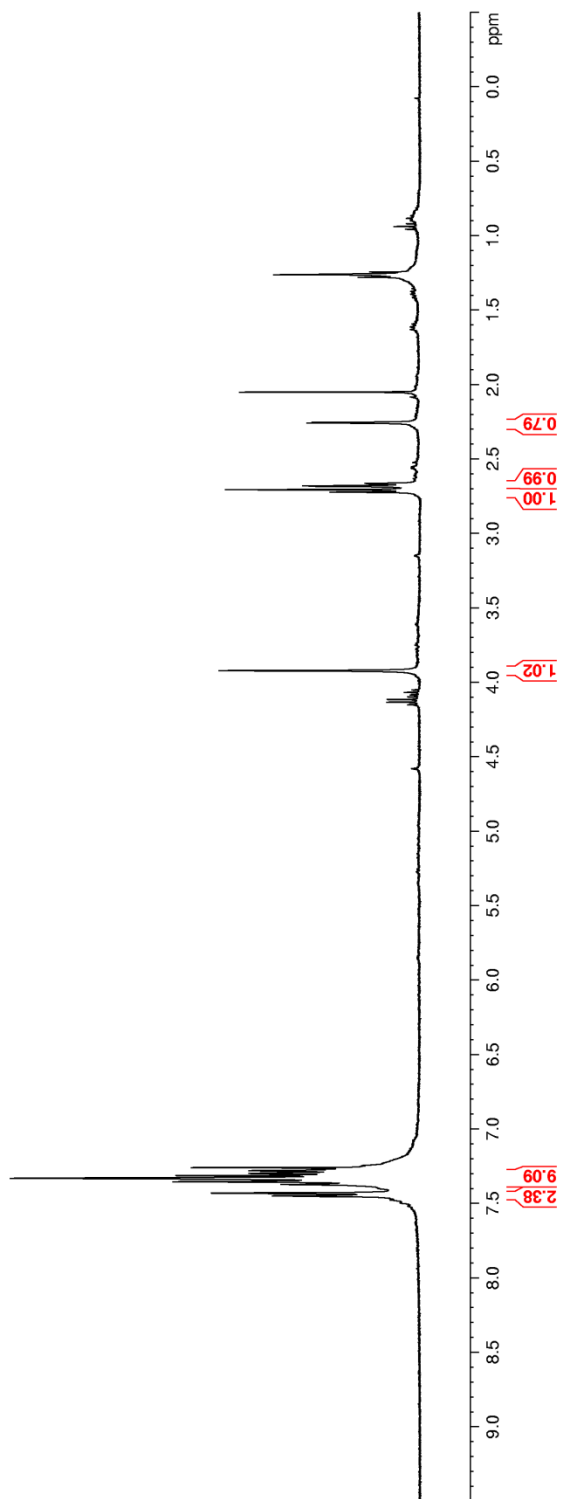

Johnston *et al.*

**Figure 6.**  $^{13}\text{C}$  NMR ( $\text{CDCl}_3$ ) of **S1**.

Supporting Information II

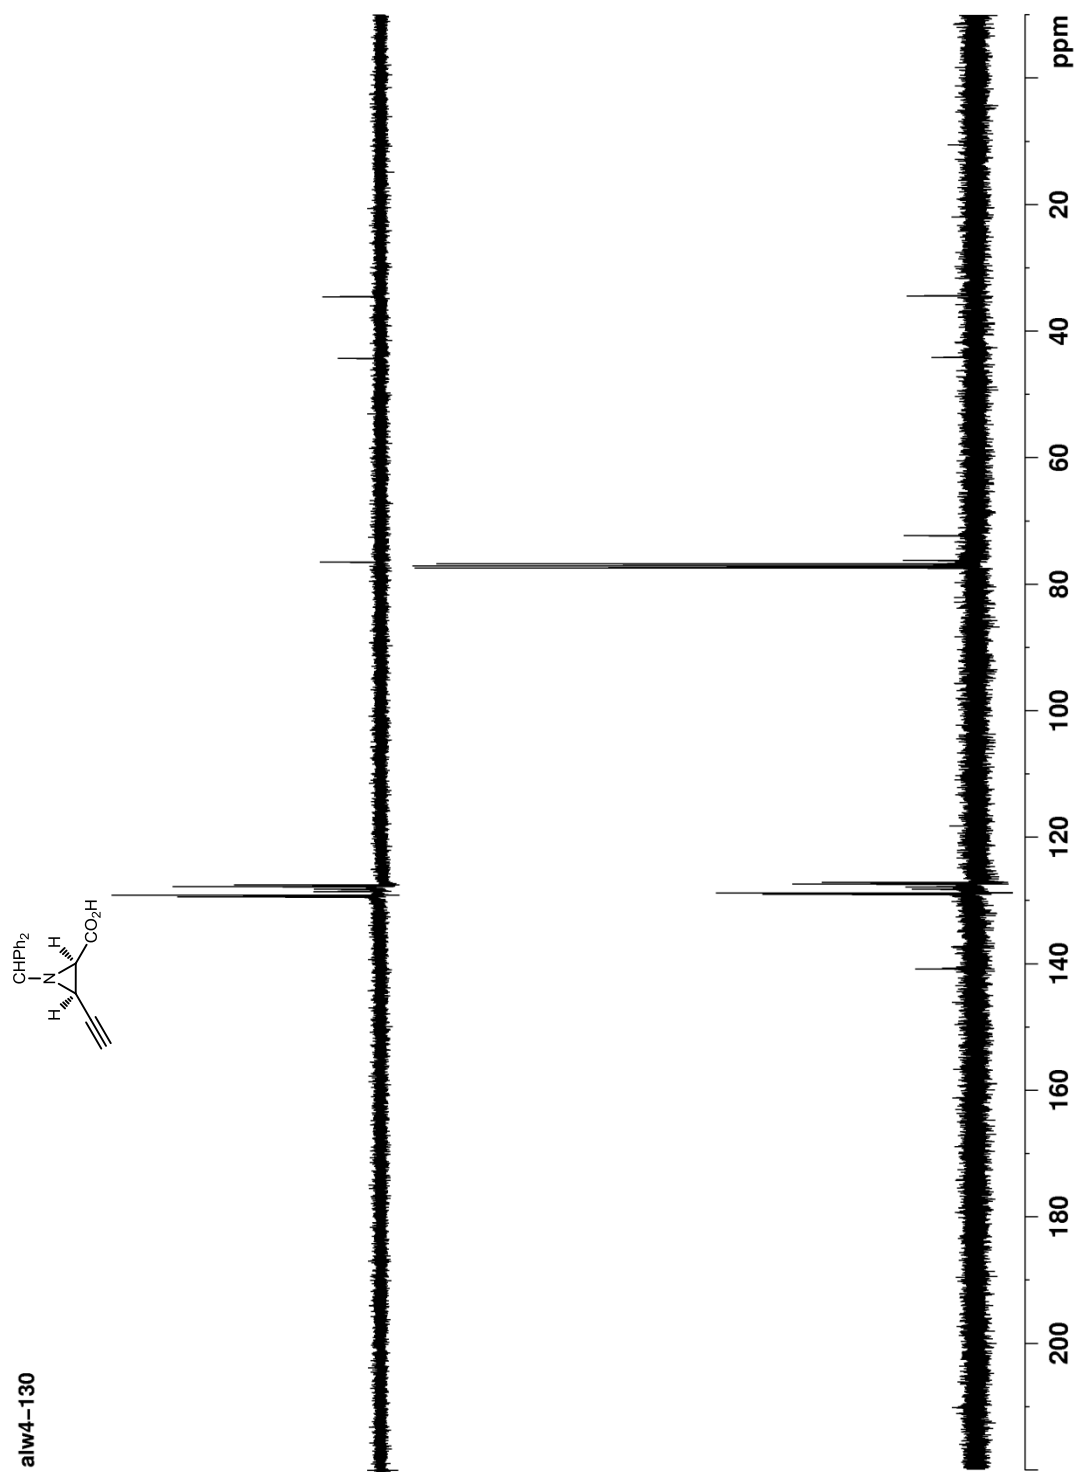

Johnston *et al.*

Figure 7.  $^1\text{H}$  NMR ( $\text{CDCl}_3$ ) of **6**.

Supporting Information II

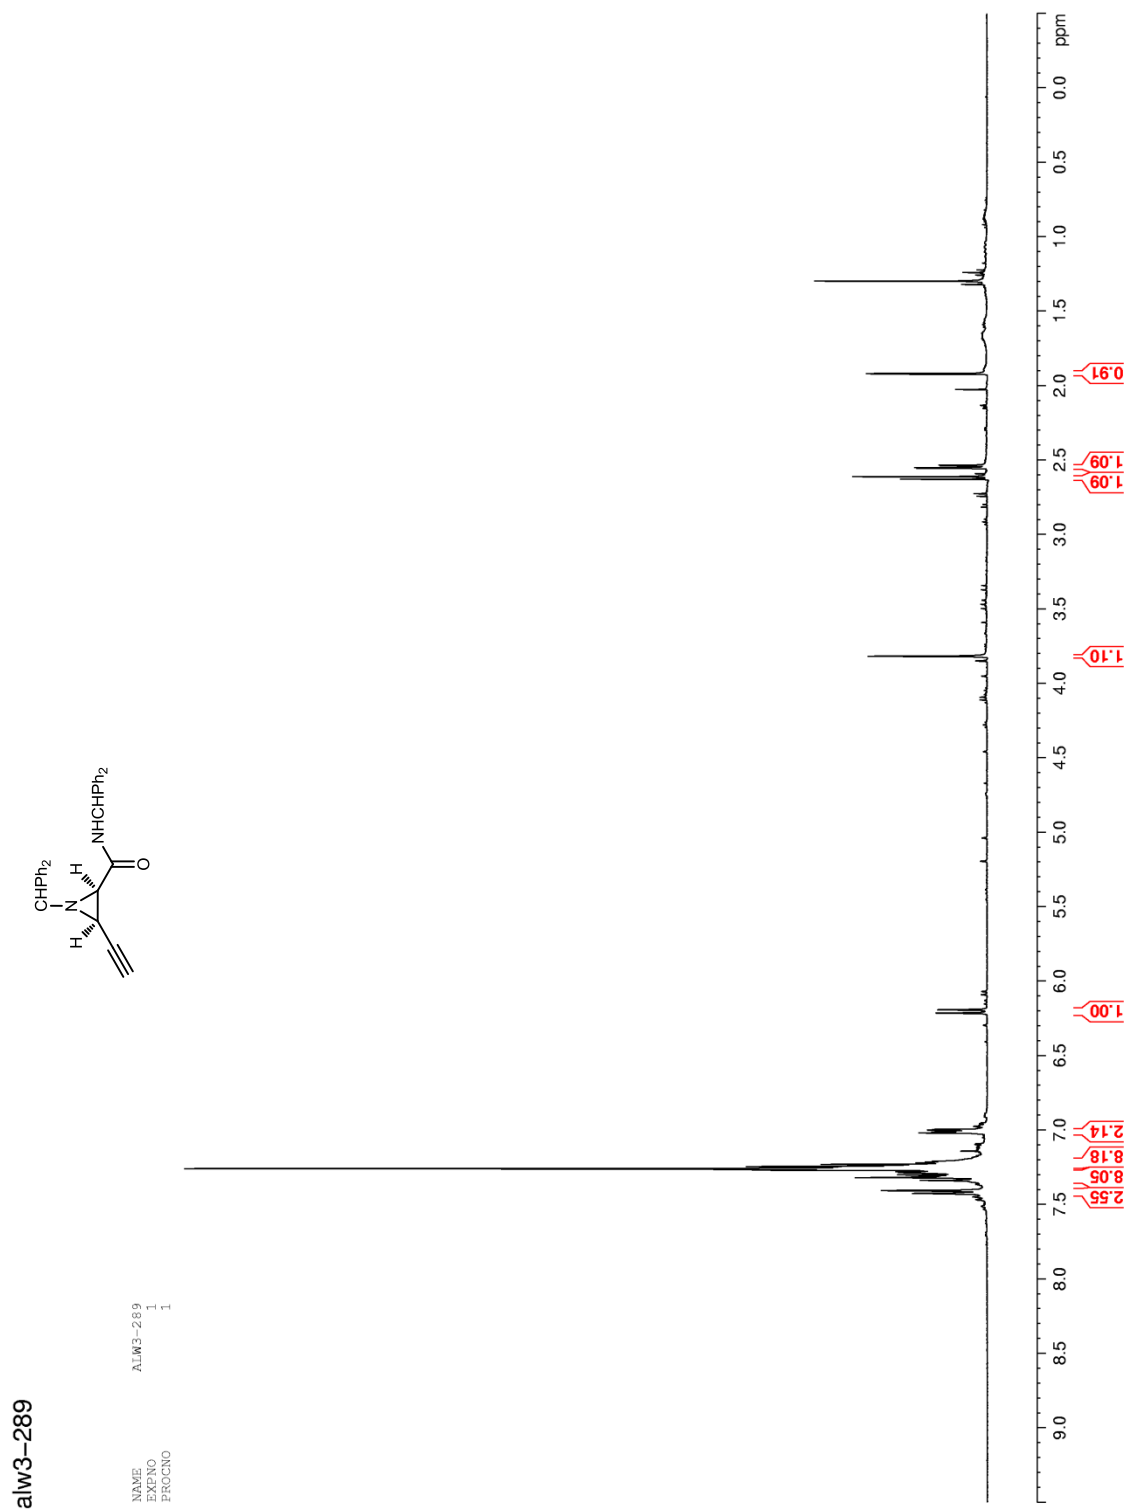

Johnston *et al.*

Supporting Information II

**Figure 8.**  $^{13}\text{C}$  NMR ( $\text{CDCl}_3$ ) of **6**.

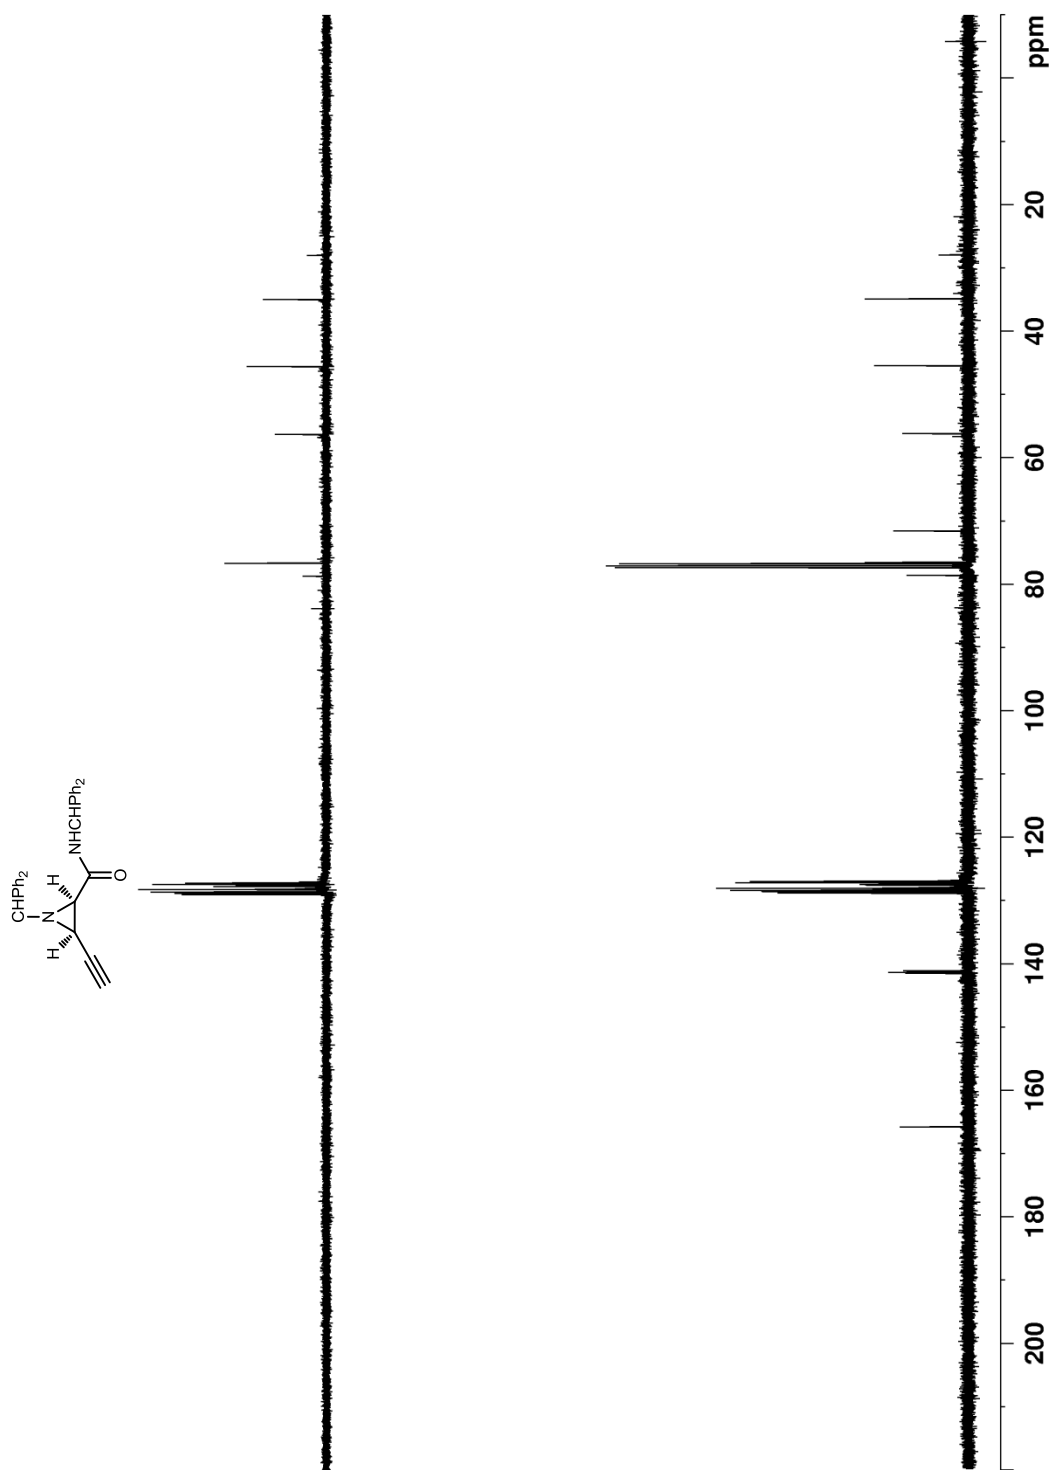



Johnston *et al.*

Figure 9. <sup>1</sup>H NMR (CDCl<sub>3</sub>) of 7.

Supporting Information II

amine

```
NAME          PAM-III-test
EXPNO         1
PROCNO       1
Date_         20101214
Time          12.52
INSTRUM      spect
PROBHD       5 mm PABBO BB-
PULPROG      zgpg30
AQ           3.4930
RG           328
SOLVENT      CDCl3
NS           16
DS           0
SWH           5200.31 Hz
F2           0.158934 Hz
FIDRES       3.1457779 sec
AQ           3.1457779 sec
RG           256
DW           96.000 usec
DE           2.000 usec
TE           295.7 K
D1           2.957 sec
D11          1.00000000 sec
TD0          1
===== CHANNEL f1 =====
NUC1          1H
P1           11.38 usec
PL           0.00 dB
SFO1         400.1320007 MHz
SI           32768
SF           400.1300000 MHz
WDW          EM
SSB          0
LB           0.30 Hz
GB           0
PC           1.00
```

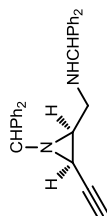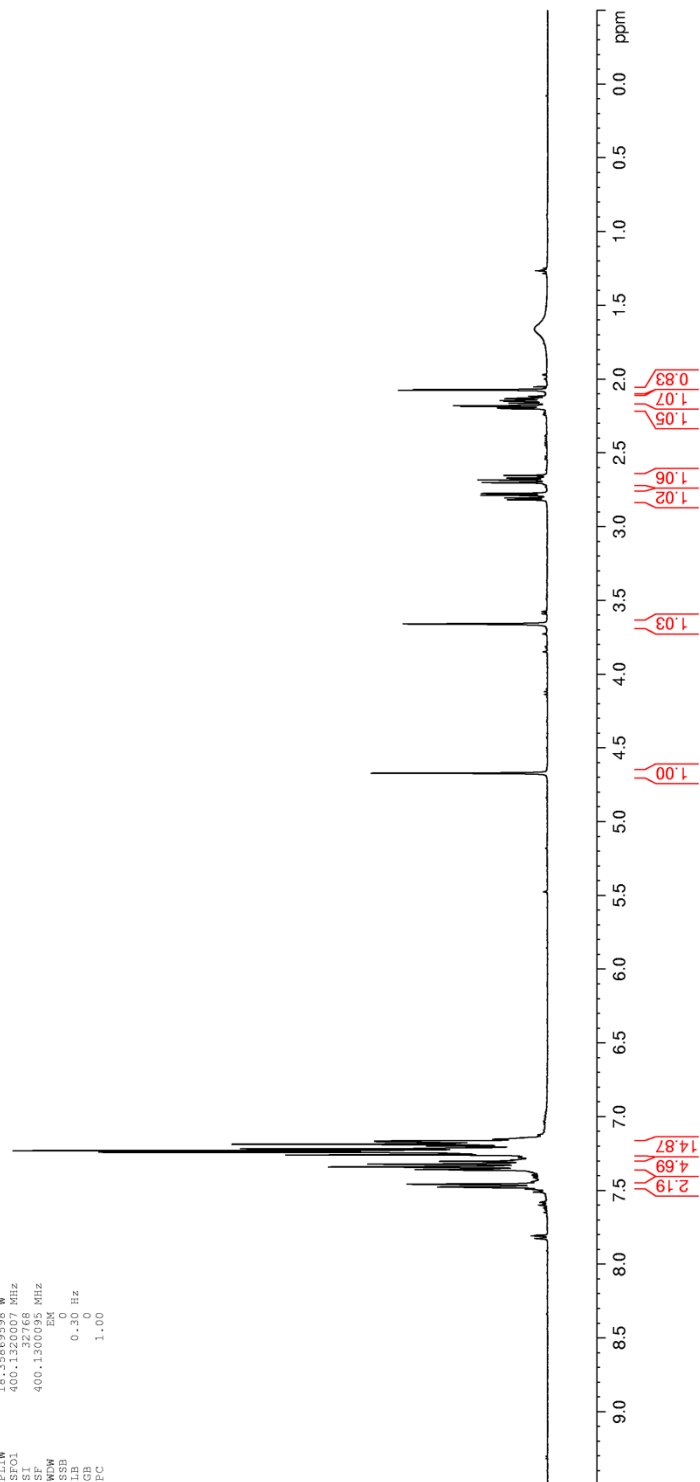

Johnston *et al.*

Supporting Information II

Figure 10.  $^{13}\text{C}$  NMR ( $\text{CDCl}_3$ ) of 7.

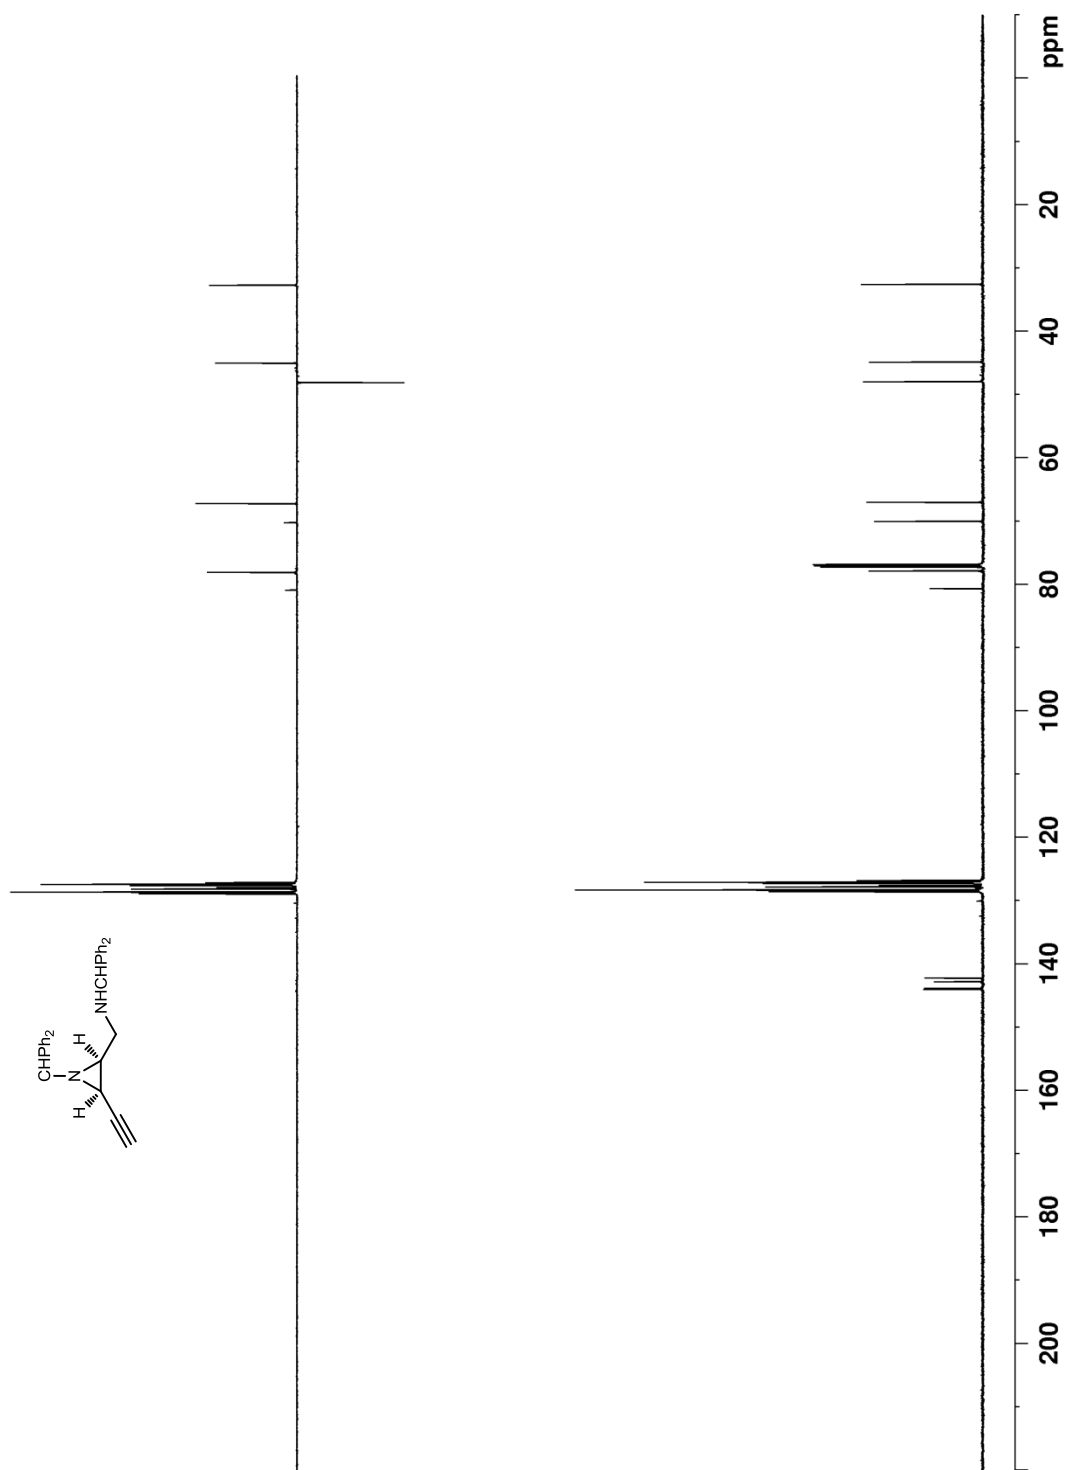

Johnston *et al.*

Supporting Information II

Figure 11.  $^1\text{H}$  NMR ( $\text{CDCl}_3$ ) of 11.

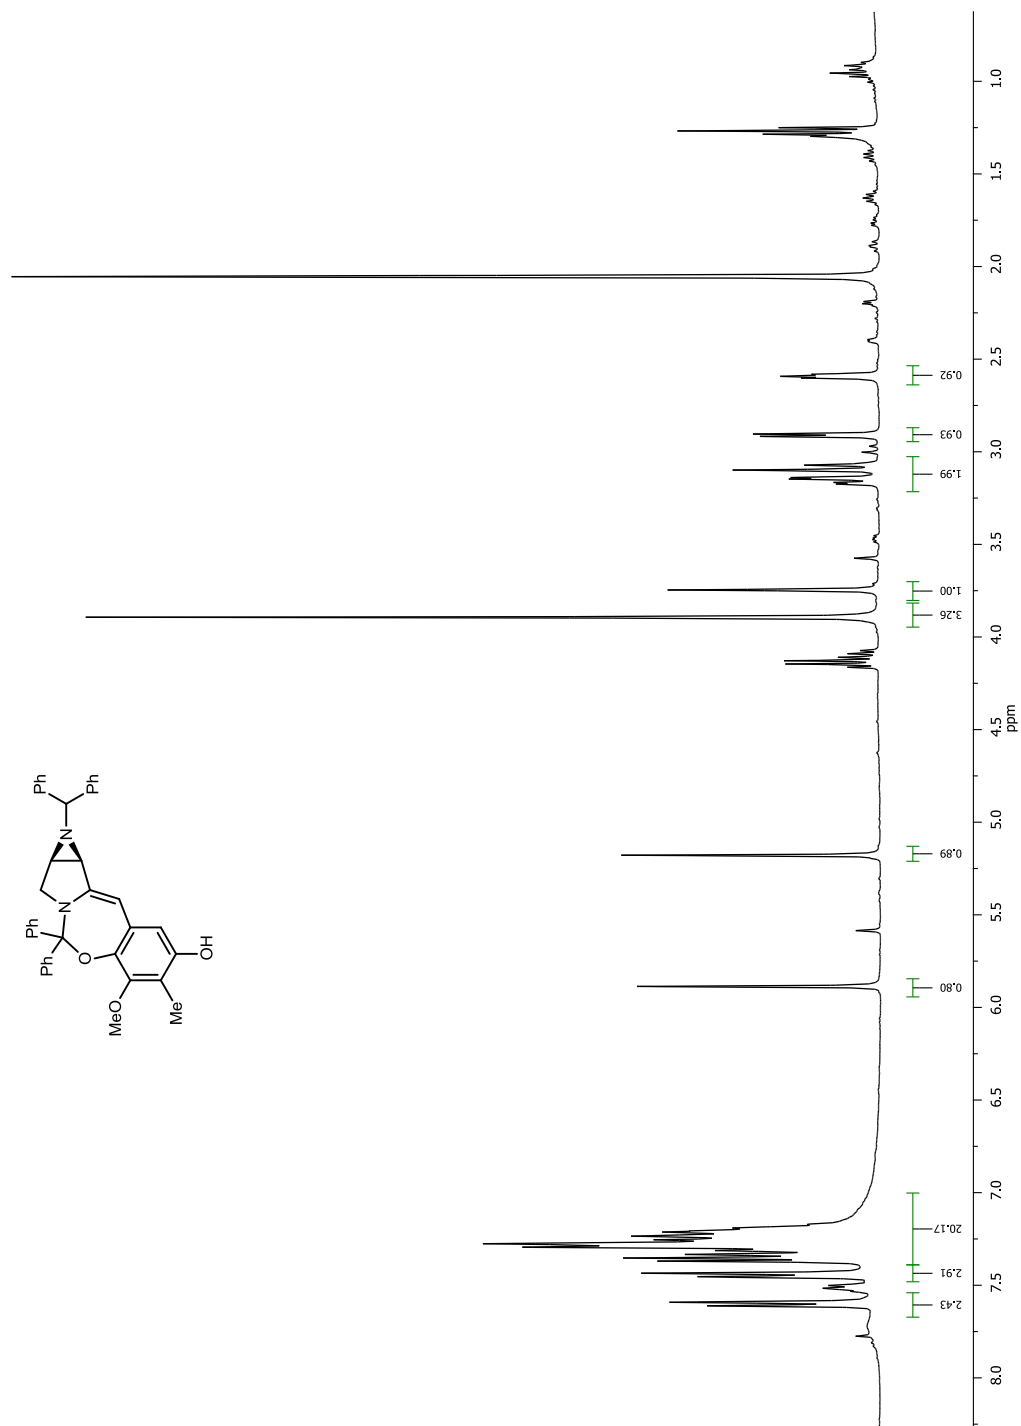

Johnston et al.

Figure 12.  $^{13}\text{C}$  NMR ( $\text{CDCl}_3$ ) of 11.

Supporting Information II

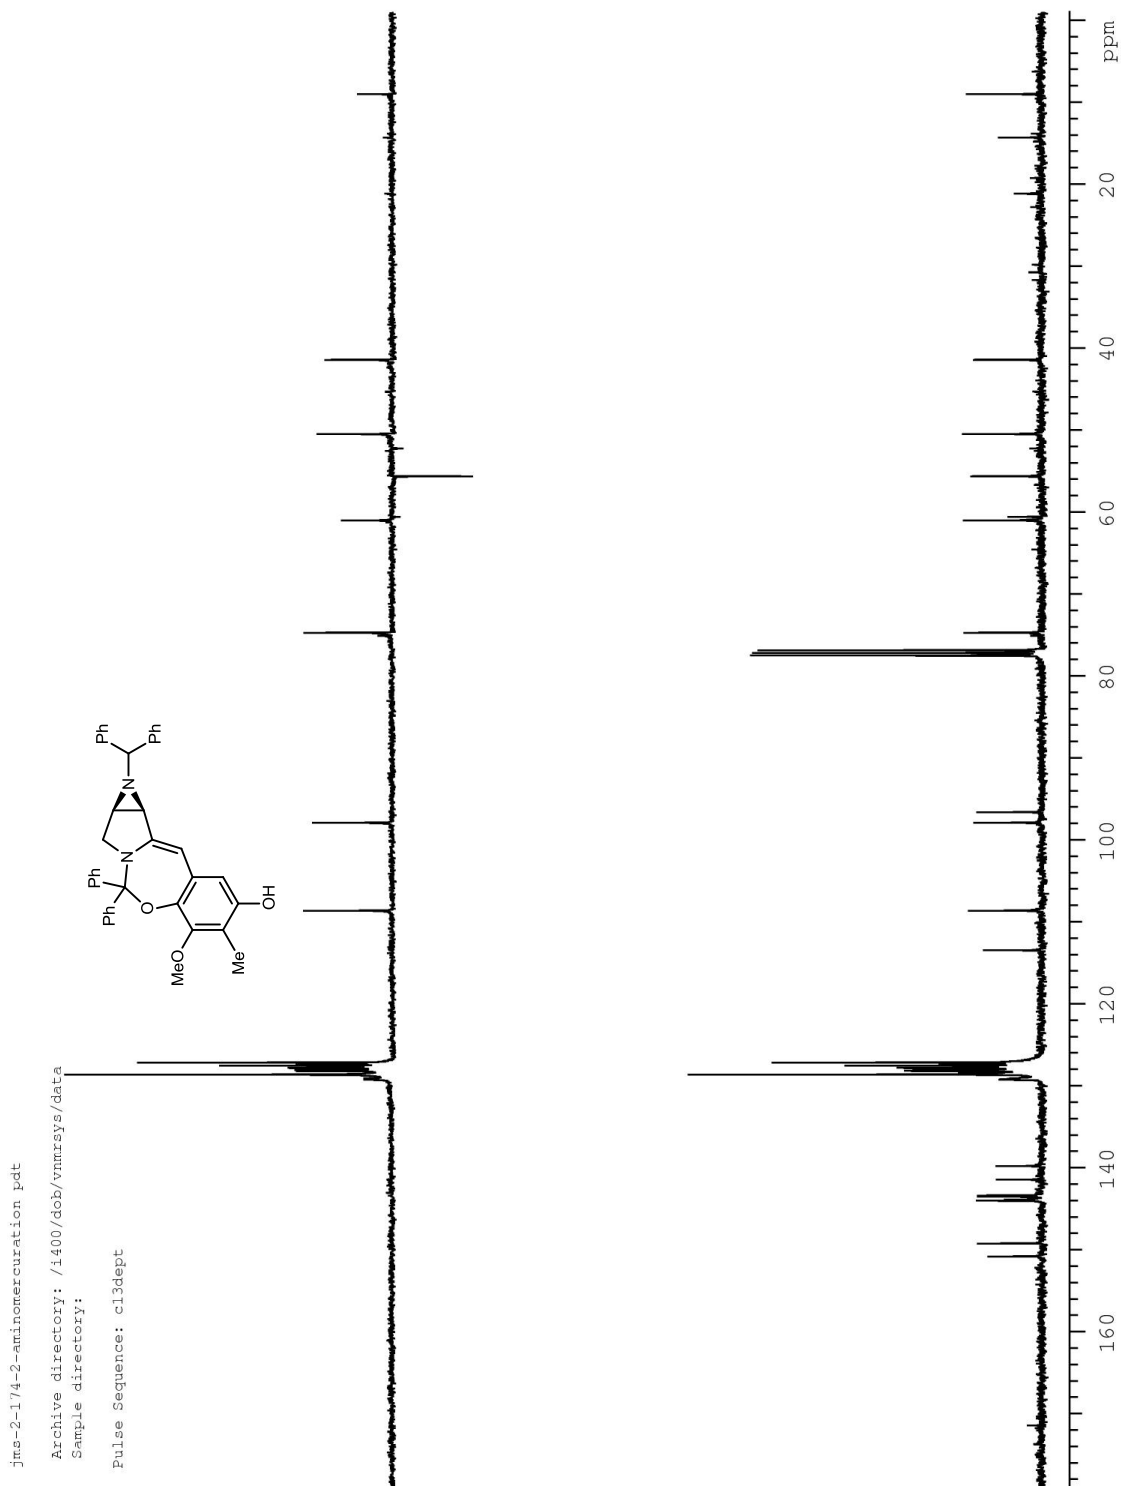

Johnston *et al.*

Supporting Information II

Figure 13.  $^1\text{H}$  NMR ( $\text{CDCl}_3$ ) of S2.

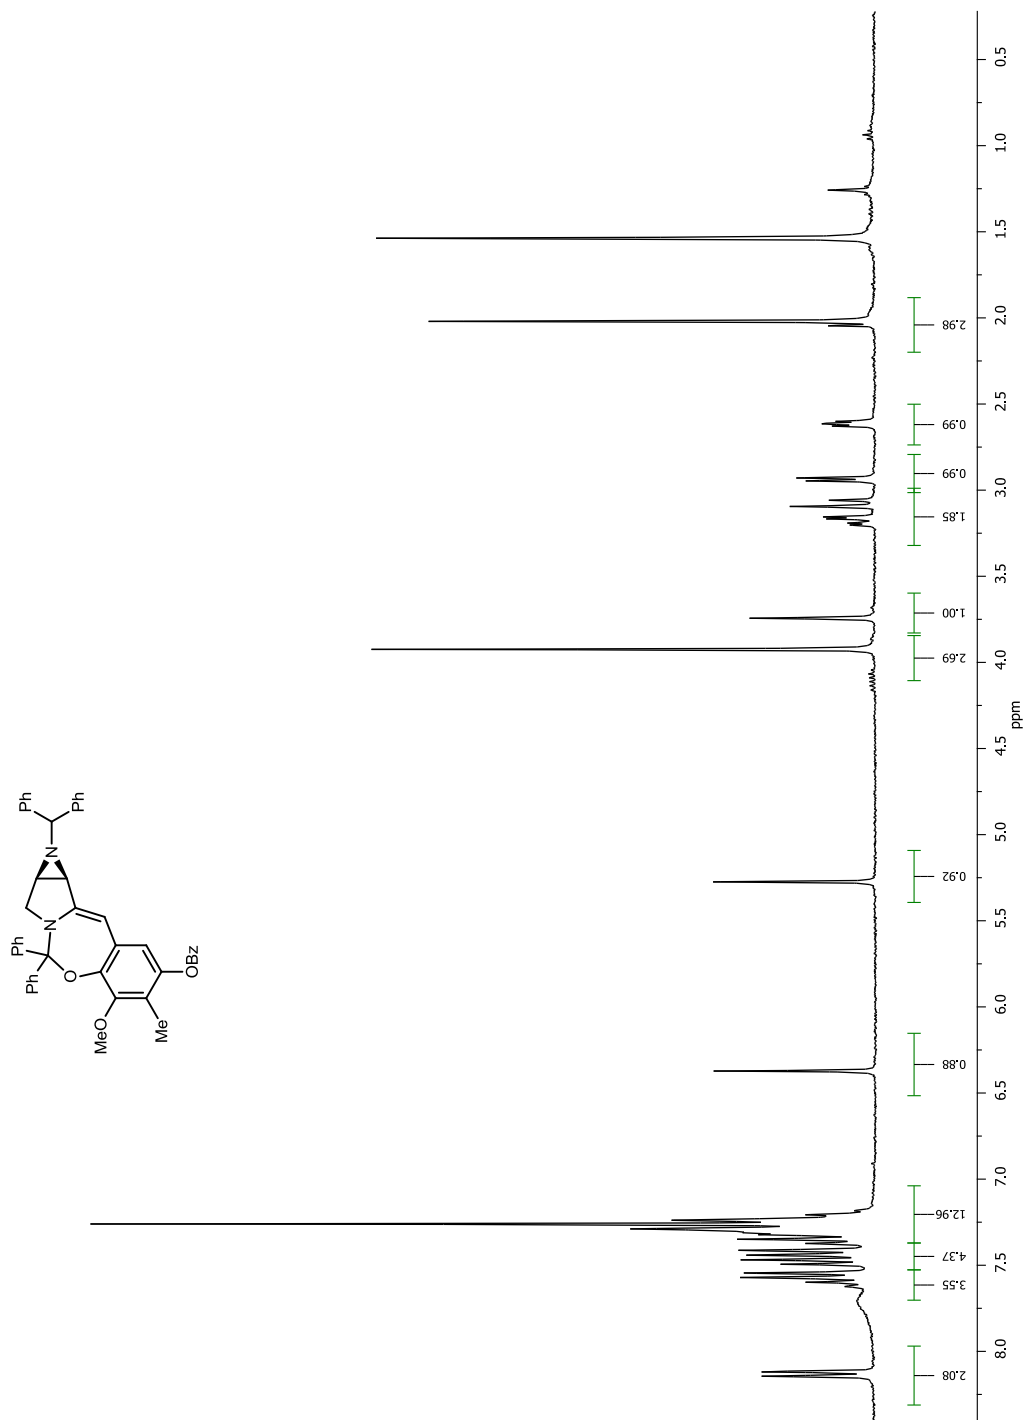

Johnston et al.

Figure 14.  $^{13}\text{C}$  NMR ( $\text{CDCl}_3$ ) of S2.

Supporting Information II

jms-2-95  
Archive directory: /i400/dob/vnmrsys/data  
Sample directory:  
Pulse Sequence: c13dept

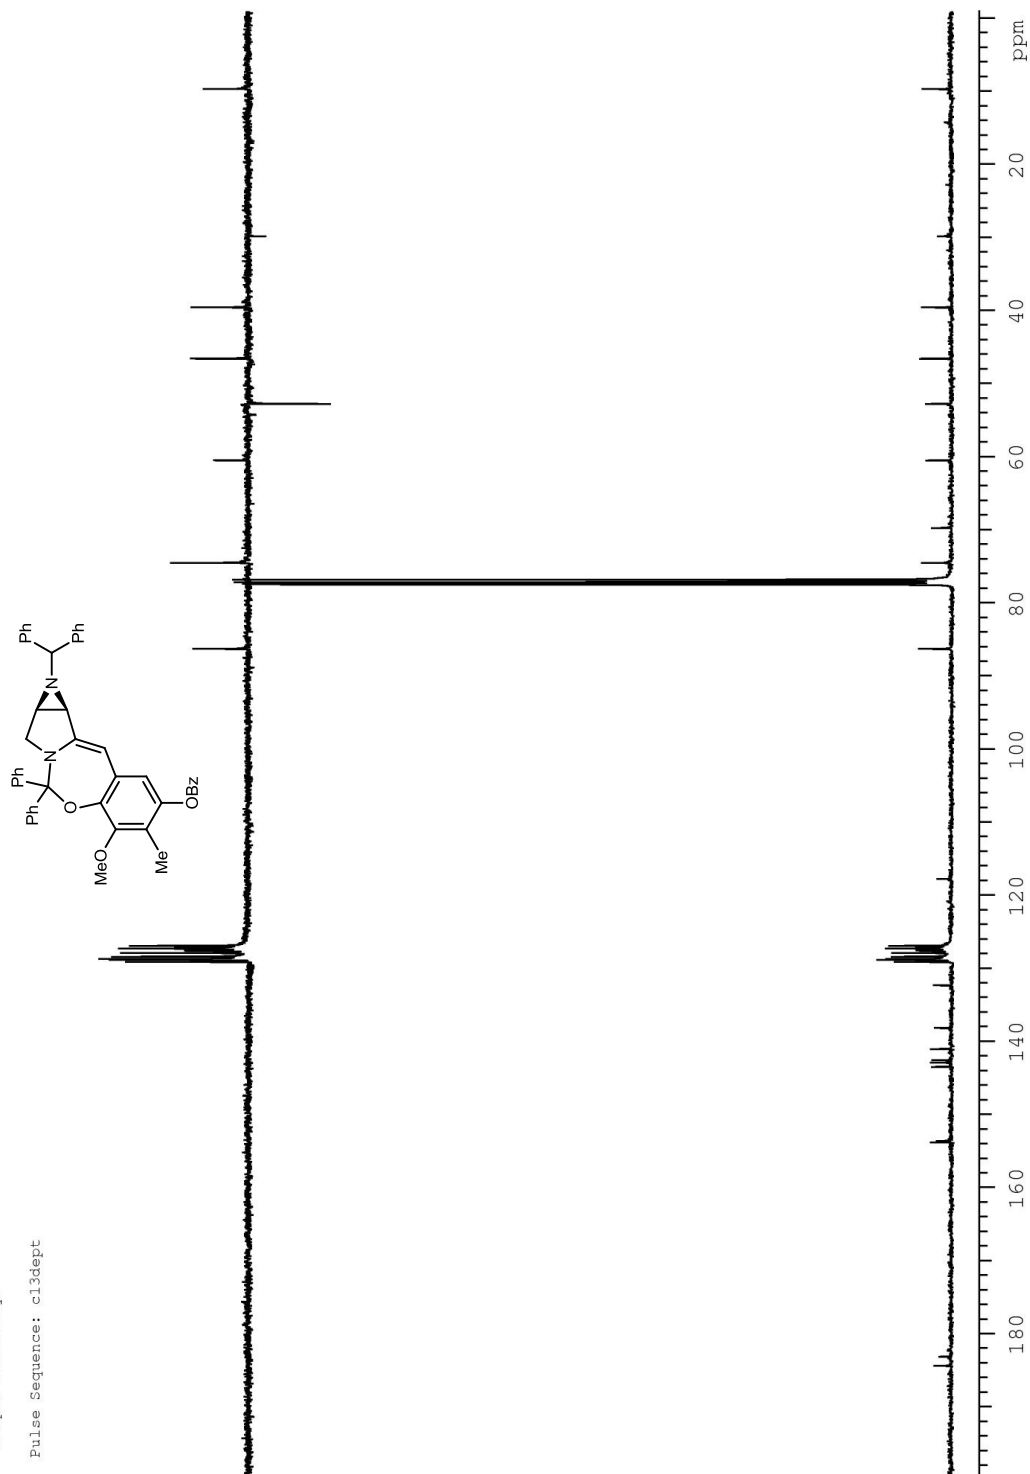

Johnston *et al.*

Figure 15.  $^1\text{H}$  NMR ( $\text{CDCl}_3$ ) of **12**.

Supporting Information II

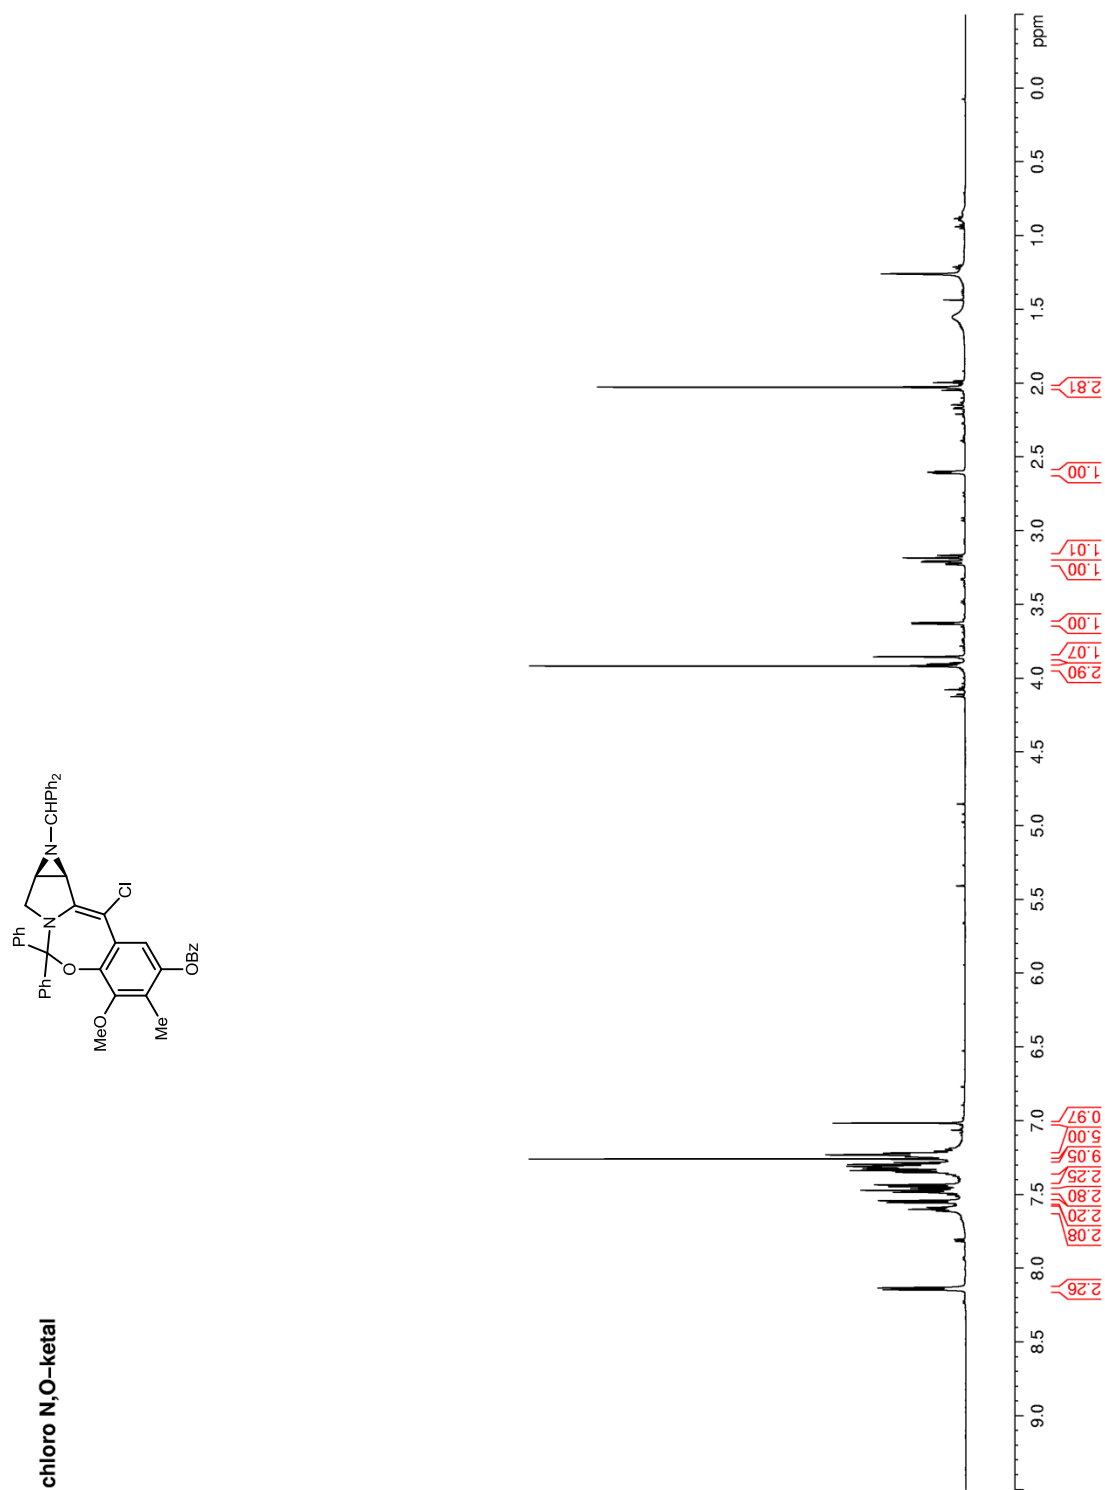

Johnston *et al.*

Supporting Information II

**Figure 16.**  $^{13}\text{C}$  NMR ( $\text{CDCl}_3$ ) of **12**.

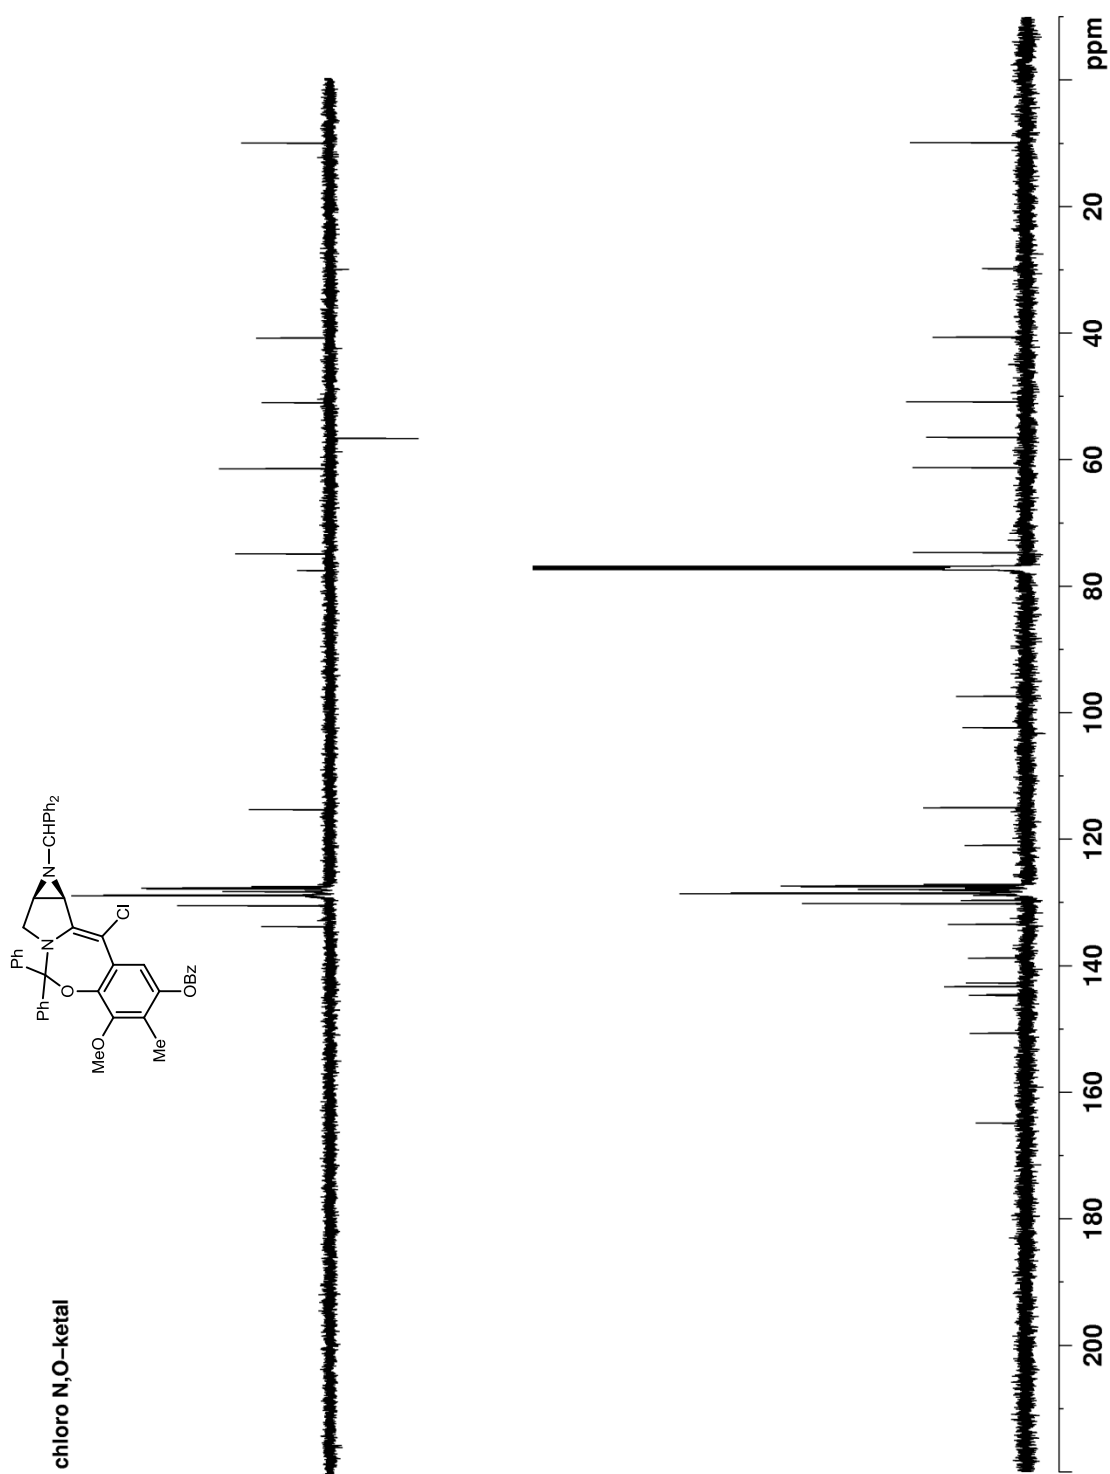



Johnston *et al.*

Figure 17.  $^1\text{H}$  NMR ( $\text{CDCl}_3$ ) of S4.

Supporting Information II

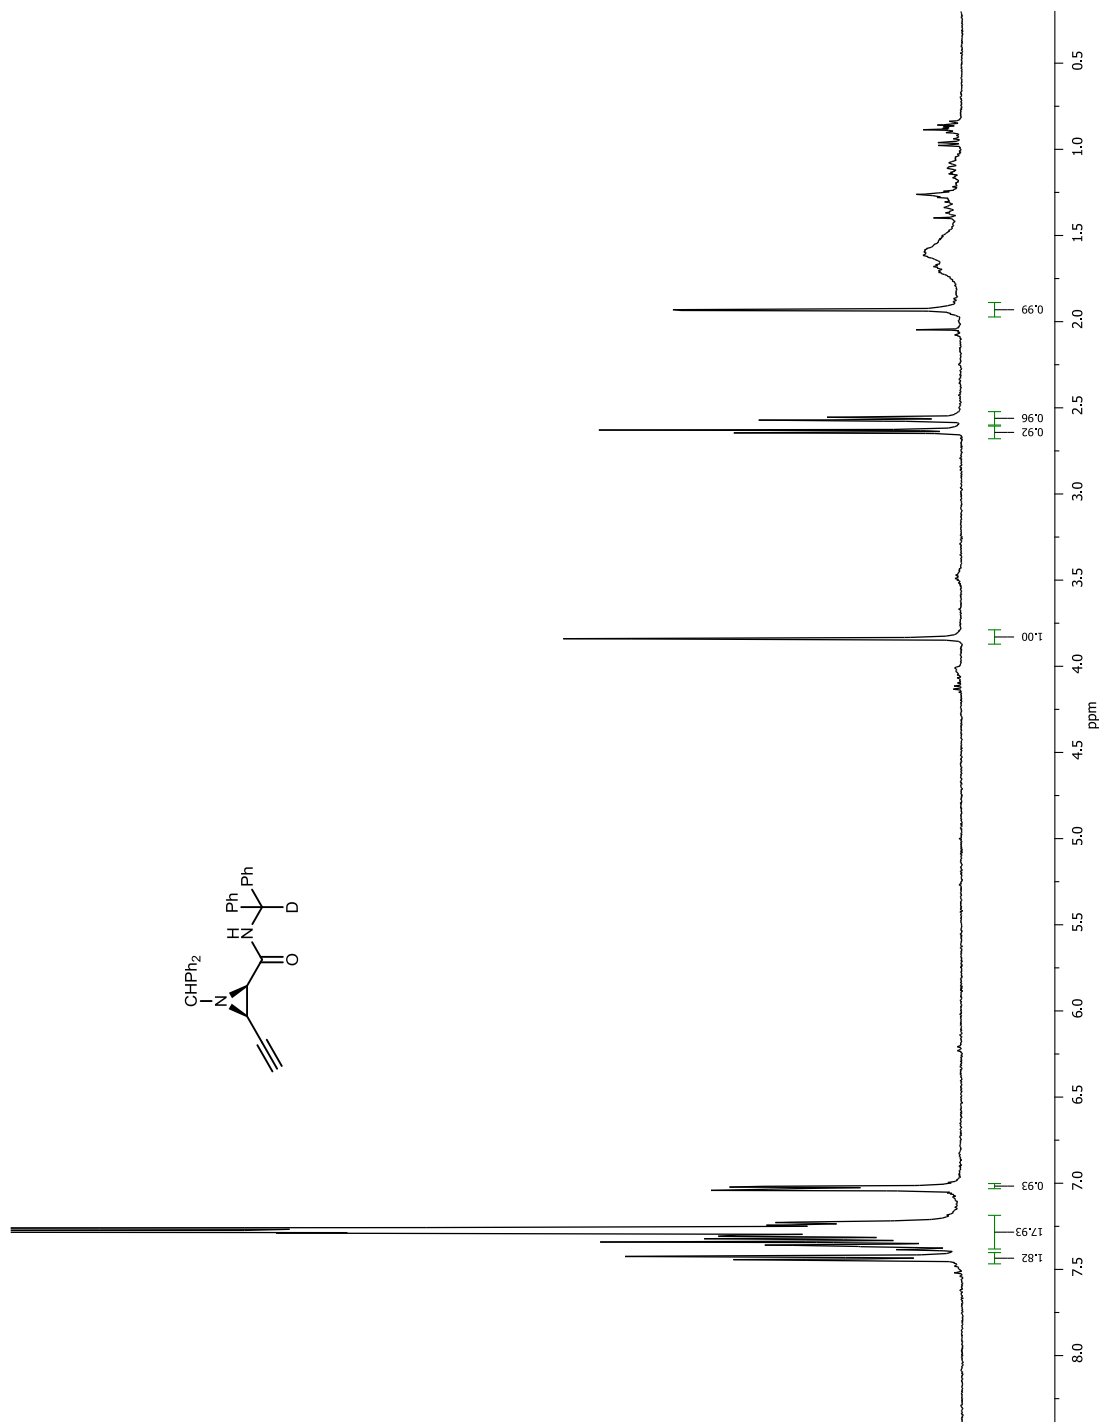

Johnston *et al.*

**Figure 18.**  $^{13}\text{C}$  NMR ( $\text{CDCl}_3$ ) of **S4**.

Supporting Information II

jms-2-248-2-C13DEPT

Archive directory: /1400/dob/vnmrsys/data

Sample directory:

Pulse Sequence: c13dept

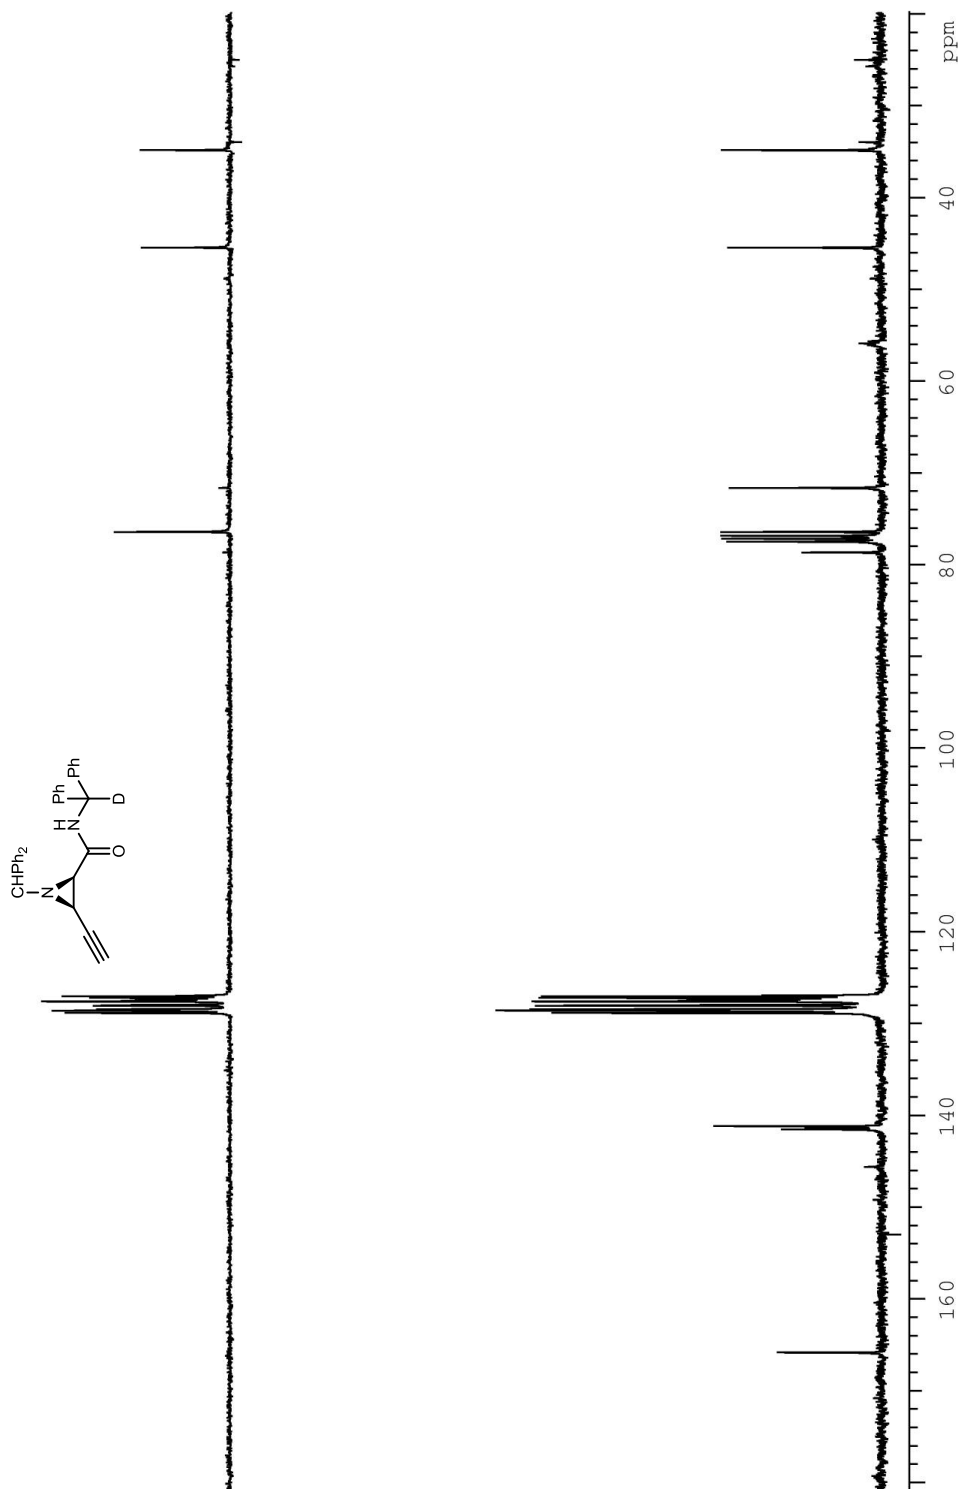

Johnston *et al.*

**Figure 19.**  $^1\text{H}$  NMR ( $\text{CDCl}_3$ ) of **13**.

Supporting Information II

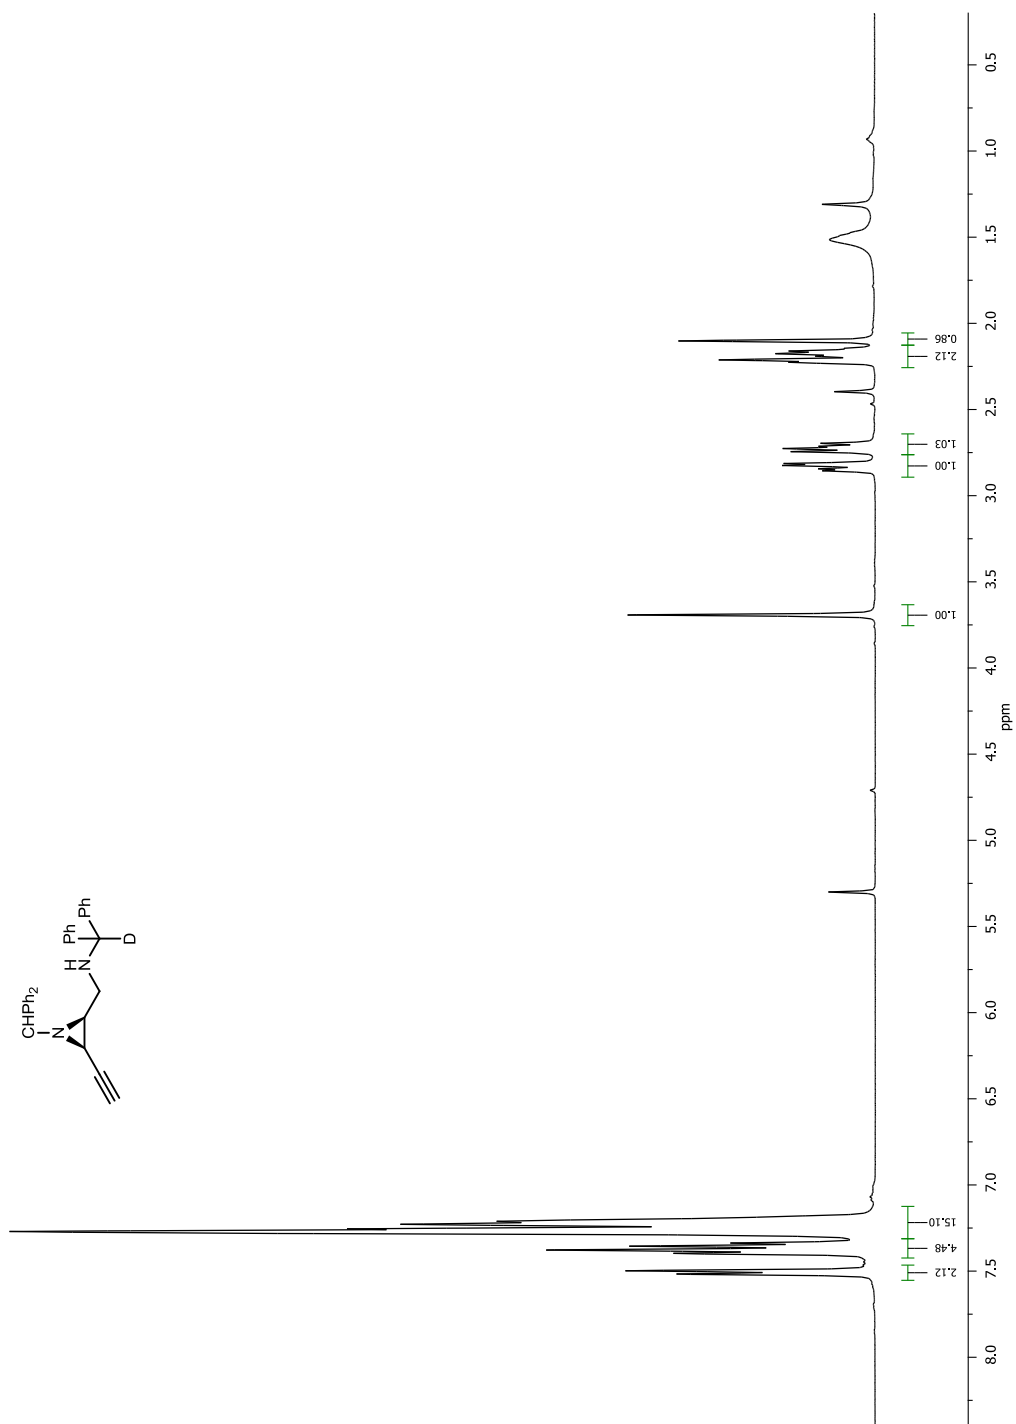

Johnston *et al.*

Figure 20.  $^{13}\text{C}$  NMR ( $\text{CDCl}_3$ ) of **13**.

Supporting Information II

jms-2-250-C13DEPT

Archive directory: /1400/dob/vnmrsys/data

Sample directory:

Pulse Sequence: c13dept

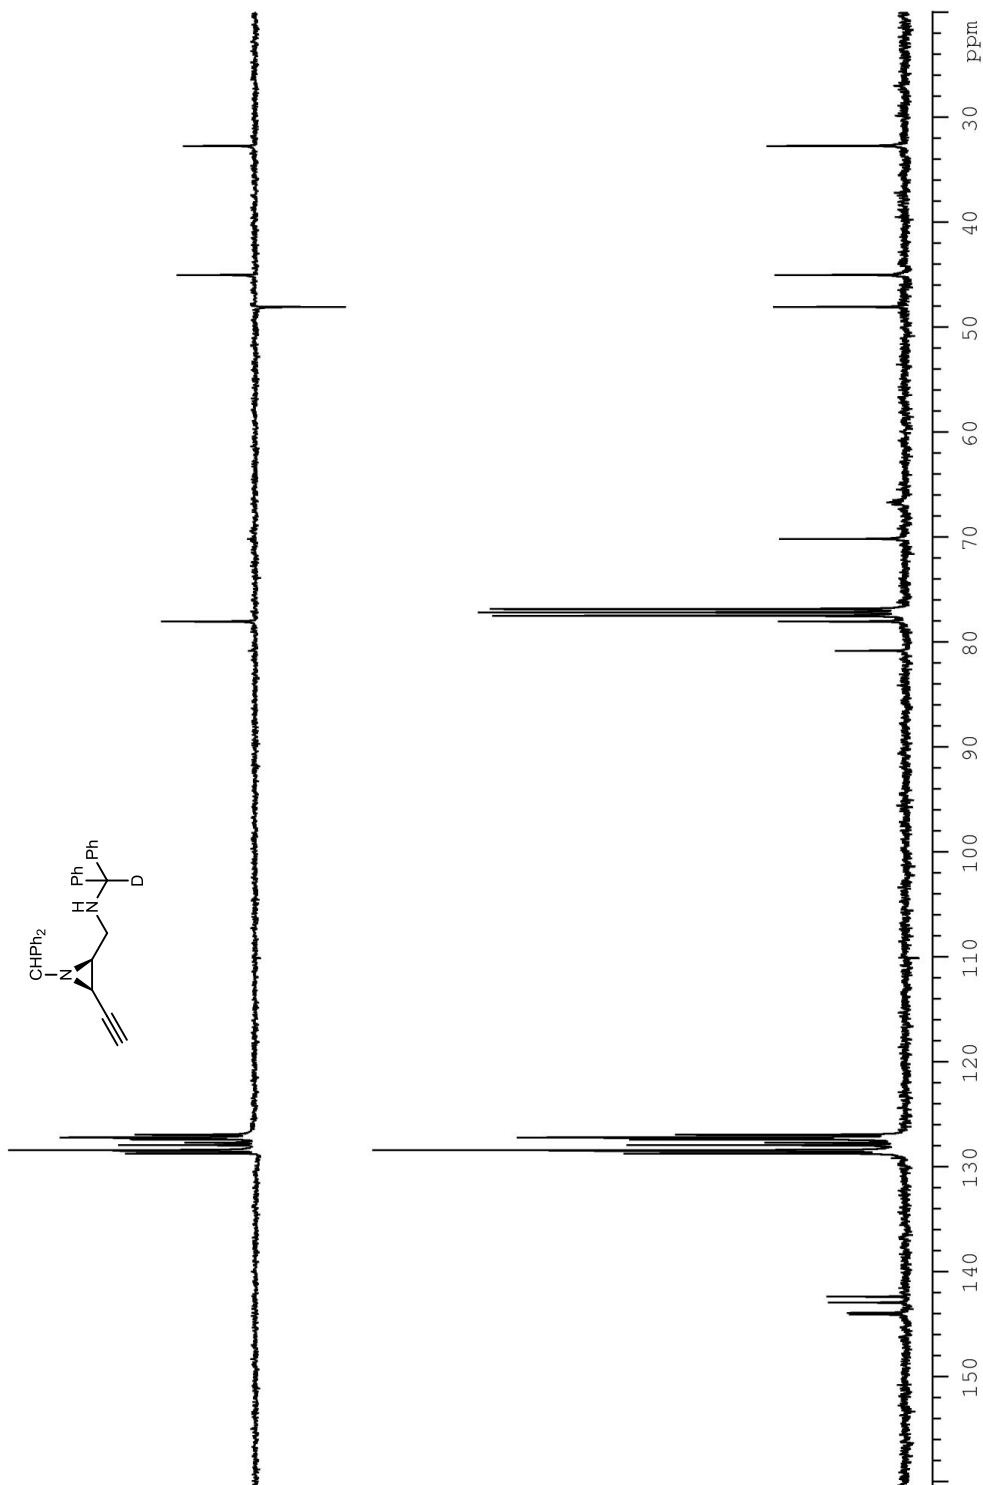

Johnston *et al.*

**Figure 21.**  $^1\text{H}$  NMR ( $\text{CDCl}_3$ ) of **14**.

Supporting Information II

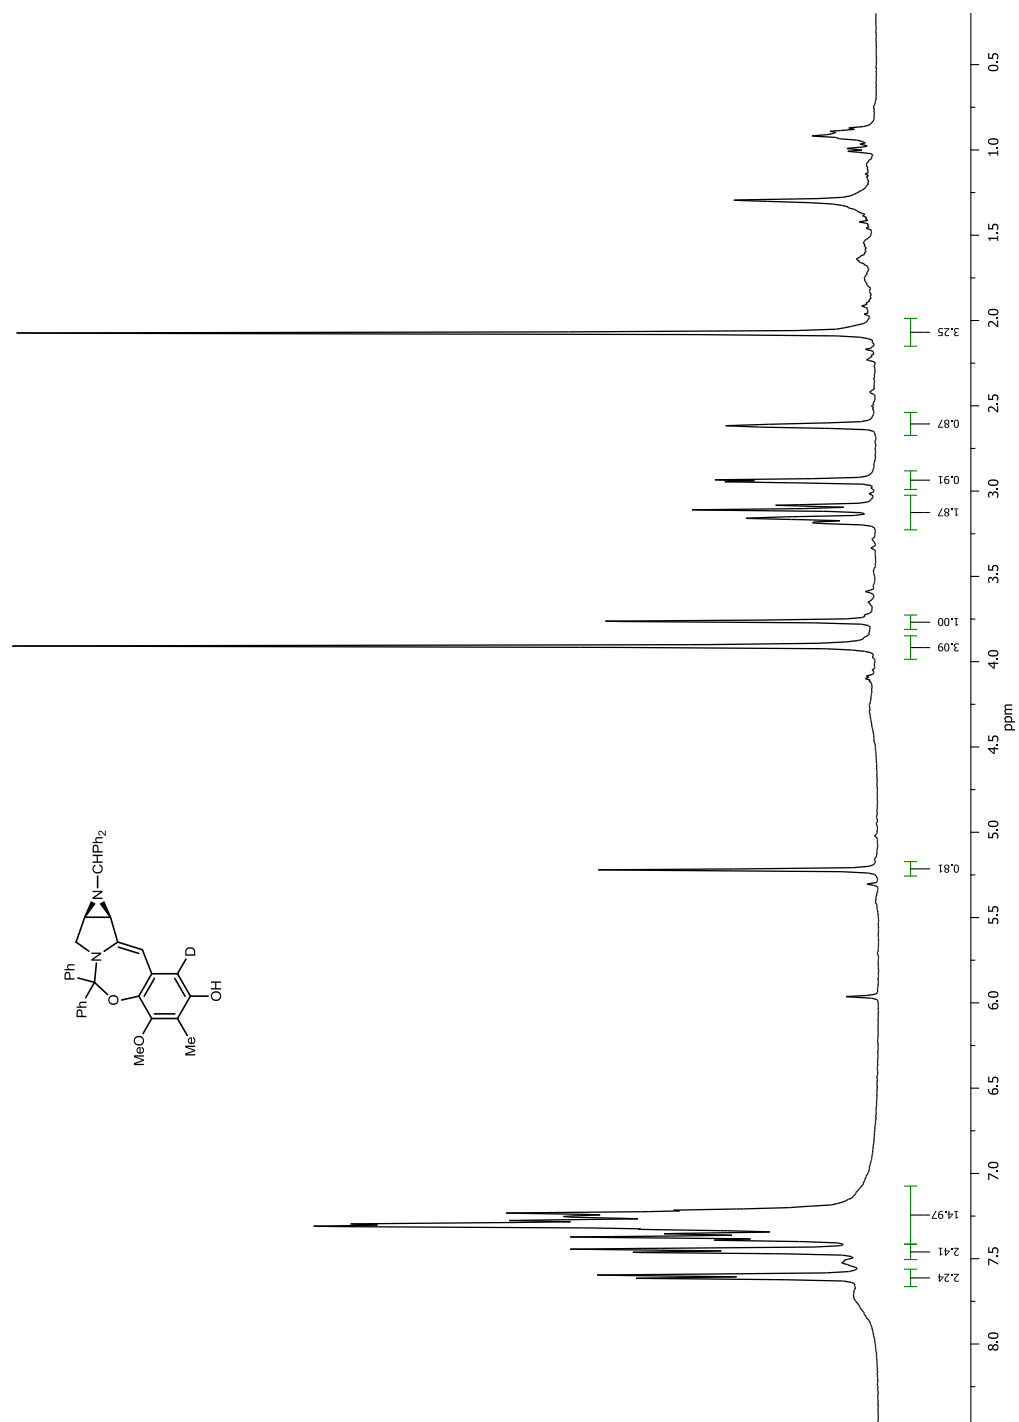

Johnston et al.

Figure 22.  $^{13}\text{C}$  NMR ( $\text{CDCl}_3$ ) of 14.

Supporting Information II

jms-2-253-C13DEPT

Archive directory: /1400/dob/vnmrsys/data

Sample directory:

Pulse Sequence: c13dept

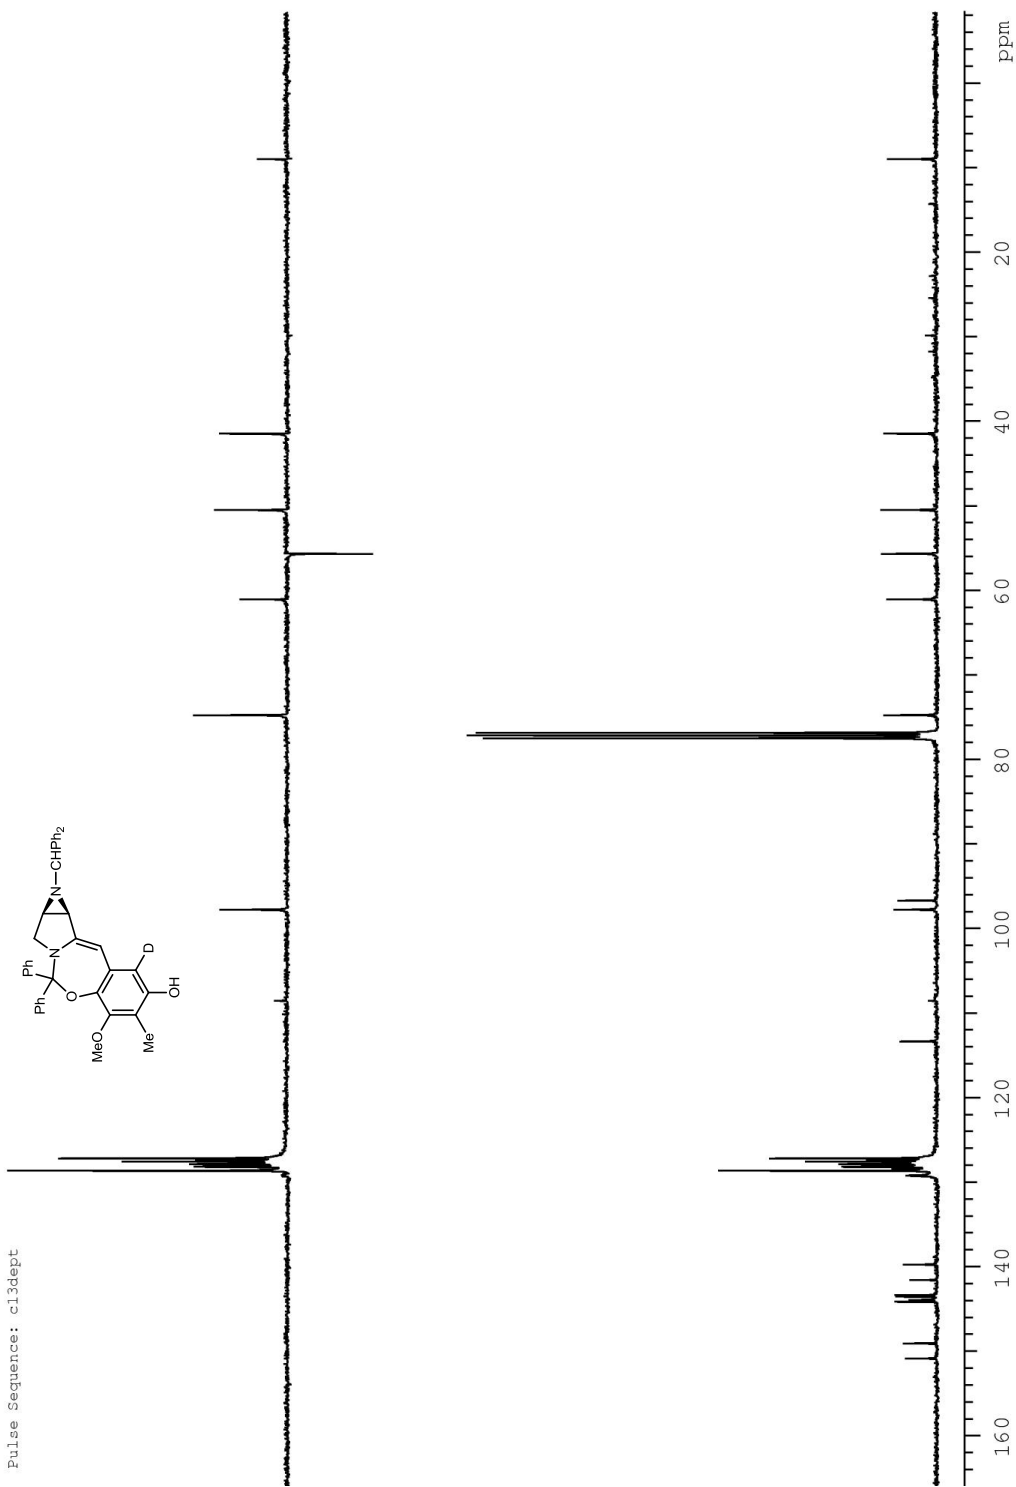

**X-ray Crystal Analysis of 12.**

**Figure 23.** Crystal Structure of 12

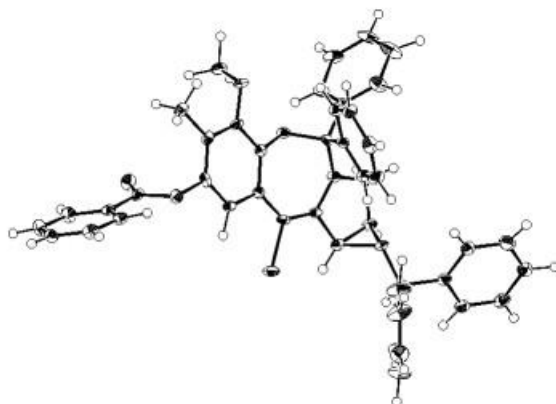

Note: Data were collected on a Bruker SMART 6000 sealed-tube system comprising a three-circle platform goniostat, an HOG crystal monochromator, a four kilopixel by four kilopixel single-chip CCD-based detector, a K761 high voltage generator, and a PC interface running Bruker's SMART software.

**Table 1.** Fractional Coordinates and Isotropic Thermal Parameters for 12

| Atom   | x         | y         | z        | Uiso   |
|--------|-----------|-----------|----------|--------|
| C1 (1) | 9827 (1)  | 844 (1)   | 4639 (1) | 24 (1) |
| O (10) | 10237 (2) | 3213 (1)  | 3856 (1) | 18 (1) |
| O (42) | 9727 (2)  | 4255 (1)  | 4894 (1) | 20 (1) |
| O (45) | 8510 (2)  | 2517 (1)  | 6852 (1) | 19 (1) |
| O (47) | 6845 (2)  | 2783 (1)  | 6246 (2) | 26 (1) |
| N (5)  | 12270 (3) | 994 (2)   | 3056 (2) | 17 (1) |
| N (8)  | 11193 (2) | 2301 (2)  | 3187 (2) | 17 (1) |
| C (2)  | 10182 (3) | 1708 (2)  | 4298 (2) | 16 (1) |
| C (3)  | 10753 (3) | 1723 (2)  | 3600 (2) | 15 (1) |
| C (4)  | 11034 (3) | 1075 (2)  | 3110 (2) | 18 (1) |
| C (6)  | 11623 (3) | 1315 (2)  | 2370 (2) | 18 (1) |
| C (7)  | 11681 (3) | 2118 (2)  | 2388 (2) | 18 (1) |
| C (9)  | 11318 (3) | 2999 (2)  | 3562 (2) | 17 (1) |
| C (11) | 9924 (3)  | 3004 (2)  | 4626 (2) | 15 (1) |
| C (12) | 9586 (3)  | 3553 (2)  | 5145 (2) | 18 (1) |
| C (13) | 9117 (3)  | 3423 (2)  | 5900 (2) | 18 (1) |
| C (14) | 9007 (3)  | 2701 (2)  | 6098 (2) | 17 (1) |
| C (15) | 9361 (3)  | 2150 (2)  | 5614 (2) | 16 (1) |
| C (16) | 9840 (3)  | 2283 (2)  | 4848 (2) | 16 (1) |
| C (17) | 12624 (3) | 246 (2)   | 2915 (2) | 18 (1) |
| C (18) | 12925 (3) | -94 (2)   | 3750 (2) | 20 (1) |
| C (19) | 12851 (4) | -824 (2)  | 3839 (3) | 34 (1) |
| C (20) | 13182 (4) | -1153 (2) | 4587 (3) | 39 (1) |
| C (21) | 13598 (4) | -759 (2)  | 5232 (3) | 33 (1) |
| C (22) | 13686 (5) | -27 (2)   | 5155 (3) | 40 (1) |
| C (23) | 13346 (4) | 303 (2)   | 4409 (3) | 40 (1) |
| C (24) | 13609 (3) | 238 (2)   | 2360 (2) | 20 (1) |
| C (25) | 13741 (3) | -318 (2)  | 1799 (2) | 22 (1) |
| C (26) | 14634 (4) | -320 (2)  | 1284 (3) | 27 (1) |
| C (27) | 15423 (4) | 204 (2)   | 1317 (3) | 29 (1) |
| C (28) | 15307 (4) | 754 (2)   | 1896 (3) | 30 (1) |
| C (29) | 14427 (3) | 767 (2)   | 2408 (3) | 23 (1) |
| C (30) | 12162 (3) | 3005 (2)  | 4300 (2) | 17 (1) |
| C (31) | 12763 (3) | 2400 (2)  | 4521 (2) | 22 (1) |
| C (32) | 13490 (3) | 2421 (2)  | 5206 (2) | 27 (1) |

*Johnston et al.*

*Supporting Information II*

|        |           |          |          |         |
|--------|-----------|----------|----------|---------|
| C (33) | 13647 (3) | 3053 (2) | 5644 (2) | 26 (1)  |
| C (34) | 13063 (3) | 3658 (2) | 5413 (2) | 23 (1)  |
| C (35) | 12309 (3) | 3636 (2) | 4753 (2) | 21 (1)  |
| C (36) | 11547 (3) | 3560 (2) | 2906 (2) | 17 (1)  |
| C (37) | 12586 (4) | 3848 (2) | 2810 (2) | 28 (1)  |
| C (38) | 12750 (4) | 4375 (2) | 2201 (3) | 41 (1)  |
| C (39) | 11866 (4) | 4597 (2) | 1705 (3) | 36 (1)  |
| C (40) | 10833 (4) | 4299 (2) | 1792 (2) | 27 (1)  |
| C (41) | 10681 (4) | 3778 (2) | 2385 (2) | 22 (1)  |
| C (43) | 8838 (4)  | 4492 (2) | 4347 (3) | 25 (1)  |
| C (44) | 8727 (4)  | 4017 (2) | 6441 (3) | 23 (1)  |
| C (46) | 7393 (3)  | 2603 (2) | 6857 (2) | 19 (1)  |
| C (48) | 6932 (3)  | 2446 (2) | 7671 (2) | 18 (1)  |
| C (49) | 7619 (3)  | 2349 (2) | 8377 (2) | 21 (1)  |
| C (50) | 7119 (4)  | 2231 (2) | 9127 (3) | 24 (1)  |
| C (51) | 5991 (3)  | 2211 (2) | 9179 (3) | 21 (1)  |
| C (52) | 5314 (4)  | 2306 (2) | 8479 (3) | 27 (1)  |
| C (53) | 5792 (3)  | 2420 (2) | 7728 (2) | 24 (1)  |
| H (54) | 1057 (3)  | 66 (2)   | 321 (2)  | 50      |
| H (55) | 1156 (3)  | 108 (2)  | 190 (2)  | 25 (12) |
| H (56) | 1248 (3)  | 229 (2)  | 232 (2)  | 16 (10) |
| H (57) | 1121 (2)  | 228 (2)  | 193 (2)  | 9 (9)   |
| H (58) | 918 (3)   | 166 (2)  | 582 (2)  | 22 (10) |
| H (59) | 1201 (3)  | -6 (2)   | 267 (2)  | 50      |
| H (60) | 1247 (4)  | -112 (2) | 340 (3)  | 70 (16) |
| H (61) | 1303 (3)  | -166 (2) | 463 (2)  | 49 (13) |
| H (62) | 1397 (3)  | -98 (2)  | 581 (3)  | 64 (15) |
| H (63) | 1408 (4)  | 28 (2)   | 556 (3)  | 66 (16) |
| H (64) | 1349 (4)  | 82 (3)   | 432 (3)  | 77 (17) |
| H (65) | 1310 (3)  | -63 (2)  | 176 (2)  | 42 (13) |
| H (66) | 1475 (3)  | -68 (2)  | 97 (2)   | 31 (12) |
| H (67) | 1608 (3)  | 17 (2)   | 92 (3)   | 50      |
| H (68) | 1593 (3)  | 105 (2)  | 191 (2)  | 31 (12) |
| H (69) | 1429 (3)  | 109 (2)  | 279 (2)  | 55 (15) |
| H (70) | 1265 (2)  | 194 (2)  | 425 (2)  | 3 (8)   |
| H (71) | 1394 (3)  | 202 (2)  | 537 (2)  | 29 (11) |
| H (72) | 1421 (2)  | 307 (2)  | 613 (2)  | 11 (9)  |
| H (73) | 1320 (3)  | 414 (2)  | 570 (2)  | 26 (10) |
| H (74) | 1187 (3)  | 404 (2)  | 464 (2)  | 36 (12) |
| H (75) | 1328 (3)  | 375 (2)  | 315 (2)  | 27 (11) |
| H (76) | 1359 (3)  | 450 (2)  | 214 (2)  | 45 (13) |
| H (77) | 1199 (3)  | 494 (2)  | 125 (3)  | 53 (14) |
| H (78) | 1028 (2)  | 445 (2)  | 144 (2)  | 1 (9)   |
| H (79) | 992 (2)   | 361 (2)  | 245 (2)  | 5 (9)   |
| H (80) | 886 (3)   | 426 (2)  | 385 (2)  | 27 (12) |
| H (81) | 895 (3)   | 506 (2)  | 427 (2)  | 48 (13) |
| H (82) | 811 (3)   | 445 (2)  | 465 (2)  | 16 (10) |
| H (83) | 923 (3)   | 445 (2)  | 638 (2)  | 47 (13) |
| H (84) | 796 (3)   | 414 (2)  | 634 (2)  | 44 (13) |
| H (85) | 887 (3)   | 388 (2)  | 701 (3)  | 47 (14) |
| H (86) | 842 (3)   | 241 (2)  | 837 (2)  | 50      |
| H (87) | 760 (3)   | 217 (2)  | 958 (2)  | 32 (12) |
| H (88) | 566 (3)   | 215 (2)  | 968 (2)  | 30 (12) |
| H (89) | 454 (3)   | 224 (2)  | 853 (2)  | 43 (14) |
| H (90) | 532 (3)   | 248 (2)  | 723 (2)  | 15 (9)  |

Notes:

- 1) Fractional coordinates are X 10\*\*4 for non-hydrogen atoms and X 10\*\*3 for hydrogen atoms. Uiso values are all X 10\*\*3.
- 2) Isotropic values for those atoms refined anisotropically are calculated as one third of the trace of the orthogonalized Uij tensor.
- 3) Parameters without standard deviations were not varied.



Table 2. Anisotropic Thermal Parameters for 12

| Atom   | U11    | U22    | U33    | U23     | U13     | U12     |
|--------|--------|--------|--------|---------|---------|---------|
| C1 (1) | 39 (1) | 12 (1) | 23 (1) | 2 (1)   | 7 (1)   | -1 (1)  |
| O (10) | 23 (2) | 14 (1) | 16 (2) | -2 (1)  | 2 (1)   | -1 (1)  |
| O (42) | 27 (2) | 10 (1) | 23 (2) | -1 (1)  | -1 (1)  | 2 (1)   |
| O (45) | 22 (2) | 22 (2) | 15 (2) | 2 (1)   | 3 (1)   | 1 (1)   |
| O (47) | 25 (2) | 32 (2) | 20 (2) | 3 (1)   | -2 (1)  | 5 (1)   |
| N (5)  | 23 (2) | 10 (2) | 17 (2) | -2 (1)  | -1 (2)  | 4 (1)   |
| N (8)  | 25 (2) | 15 (2) | 12 (2) | 1 (1)   | 1 (2)   | -1 (2)  |
| C (2)  | 17 (2) | 10 (2) | 20 (2) | 4 (2)   | -4 (2)  | -2 (2)  |
| C (3)  | 21 (2) | 11 (2) | 14 (2) | -1 (2)  | -5 (2)  | -1 (2)  |
| C (4)  | 21 (2) | 15 (2) | 19 (2) | -1 (2)  | -2 (2)  | 1 (2)   |
| C (6)  | 25 (2) | 15 (2) | 14 (2) | -2 (2)  | -4 (2)  | 2 (2)   |
| C (7)  | 23 (3) | 15 (2) | 17 (2) | 3 (2)   | 1 (2)   | -1 (2)  |
| C (9)  | 19 (2) | 14 (2) | 17 (2) | 1 (2)   | 4 (2)   | -3 (2)  |
| C (11) | 14 (2) | 18 (2) | 13 (2) | 0 (2)   | -2 (2)  | -1 (2)  |
| C (12) | 17 (2) | 12 (2) | 25 (2) | 1 (2)   | -6 (2)  | 3 (2)   |
| C (13) | 18 (2) | 22 (2) | 14 (2) | -6 (2)  | 1 (2)   | 2 (2)   |
| C (14) | 13 (2) | 25 (2) | 11 (2) | 0 (2)   | -1 (2)  | -3 (2)  |
| C (15) | 19 (2) | 13 (2) | 16 (2) | 4 (2)   | -2 (2)  | 2 (2)   |
| C (16) | 14 (2) | 17 (2) | 16 (2) | 2 (2)   | -2 (2)  | 1 (2)   |
| C (17) | 21 (2) | 12 (2) | 20 (2) | -1 (2)  | -1 (2)  | 2 (2)   |
| C (18) | 21 (2) | 20 (2) | 18 (2) | 1 (2)   | 6 (2)   | -1 (2)  |
| C (19) | 52 (3) | 24 (2) | 26 (3) | 0 (2)   | -4 (2)  | -10 (3) |
| C (20) | 59 (4) | 20 (2) | 38 (3) | 10 (2)  | -4 (3)  | -10 (3) |
| C (21) | 41 (3) | 36 (3) | 23 (3) | 7 (2)   | 1 (2)   | 6 (2)   |
| C (22) | 67 (4) | 28 (3) | 24 (3) | -6 (2)  | -11 (3) | 11 (3)  |
| C (23) | 71 (4) | 24 (3) | 25 (3) | 3 (2)   | -7 (3)  | 3 (3)   |
| C (24) | 25 (2) | 16 (2) | 17 (2) | 2 (2)   | 1 (2)   | 3 (2)   |
| C (25) | 22 (3) | 17 (2) | 27 (3) | 0 (2)   | -4 (2)  | 1 (2)   |
| C (26) | 37 (3) | 22 (2) | 22 (3) | -4 (2)  | 3 (2)   | 5 (2)   |
| C (27) | 31 (3) | 24 (2) | 33 (3) | 3 (2)   | 9 (2)   | 2 (2)   |
| C (28) | 27 (3) | 26 (3) | 38 (3) | 5 (2)   | -3 (2)  | -2 (2)  |
| C (29) | 24 (2) | 20 (2) | 24 (3) | -2 (2)  | 0 (2)   | 1 (2)   |
| C (30) | 20 (2) | 12 (2) | 17 (2) | -2 (2)  | 3 (2)   | -3 (2)  |
| C (31) | 23 (2) | 16 (2) | 27 (3) | 0 (2)   | 1 (2)   | 0 (2)   |
| C (32) | 29 (3) | 23 (2) | 30 (3) | 7 (2)   | -6 (2)  | 4 (2)   |
| C (33) | 18 (2) | 37 (3) | 21 (2) | 1 (2)   | -9 (2)  | -2 (2)  |
| C (34) | 29 (3) | 22 (2) | 19 (2) | -6 (2)  | 5 (2)   | 1 (2)   |
| C (35) | 25 (3) | 18 (2) | 20 (2) | -1 (2)  | 2 (2)   | 0 (2)   |
| C (36) | 23 (2) | 14 (2) | 15 (2) | -3 (2)  | -1 (2)  | 0 (2)   |
| C (37) | 30 (3) | 31 (2) | 23 (3) | 8 (2)   | -6 (2)  | -7 (2)  |
| C (38) | 48 (3) | 41 (3) | 33 (3) | 14 (2)  | -5 (3)  | -21 (3) |
| C (39) | 54 (3) | 25 (3) | 30 (3) | 13 (2)  | 1 (3)   | -15 (2) |
| C (40) | 45 (3) | 20 (2) | 15 (2) | 5 (2)   | -9 (2)  | 2 (2)   |
| C (41) | 29 (3) | 21 (2) | 16 (2) | -6 (2)  | 1 (2)   | -7 (2)  |
| C (43) | 28 (3) | 15 (2) | 32 (3) | 0 (2)   | -2 (2)  | 2 (2)   |
| C (44) | 24 (3) | 21 (2) | 23 (3) | -7 (2)  | -1 (2)  | 5 (2)   |
| C (46) | 16 (2) | 13 (2) | 27 (3) | -10 (2) | -1 (2)  | 1 (2)   |
| C (48) | 24 (2) | 12 (2) | 17 (2) | -4 (2)  | 1 (2)   | 0 (2)   |
| C (49) | 27 (2) | 16 (2) | 18 (2) | -2 (2)  | -2 (2)  | 3 (2)   |
| C (50) | 30 (3) | 23 (2) | 17 (2) | 0 (2)   | -2 (2)  | 2 (2)   |
| C (51) | 29 (3) | 20 (2) | 16 (2) | -2 (2)  | 8 (2)   | -3 (2)  |
| C (52) | 22 (2) | 31 (3) | 29 (3) | 0 (2)   | 1 (2)   | -4 (2)  |
| C (53) | 25 (2) | 29 (2) | 17 (3) | 5 (2)   | -3 (2)  | 2 (2)   |

Form of the anisotropic thermal parameter:

$$\exp\{-2 \pi^2 [ h^2 (a^*)^2 U_{11} + \dots + 2 h k (a^*) (b^*) U_{12} ] \}$$

All values are X 10<sup>3</sup>

*Johnston et al.*

*Supporting Information II*

**Table 3.** Bond Distances (Å) for **12**

| A      | B      | Distance  |
|--------|--------|-----------|
| C1 (1) | C (2)  | 1.767 (3) |
| O (10) | C (11) | 1.372 (4) |
| O (10) | C (9)  | 1.464 (4) |
| O (42) | C (12) | 1.388 (4) |
| O (42) | C (43) | 1.437 (5) |
| O (45) | C (46) | 1.362 (4) |
| O (45) | C (14) | 1.422 (4) |
| O (47) | C (46) | 1.217 (4) |
| N (5)  | C (6)  | 1.462 (4) |
| N (5)  | C (17) | 1.485 (4) |
| N (5)  | C (4)  | 1.509 (5) |
| N (8)  | C (3)  | 1.390 (4) |
| N (8)  | C (9)  | 1.446 (4) |
| N (8)  | C (7)  | 1.480 (5) |
| C (2)  | C (3)  | 1.345 (5) |
| C (2)  | C (16) | 1.466 (5) |
| C (3)  | C (4)  | 1.494 (5) |
| C (4)  | C (6)  | 1.485 (5) |
| C (4)  | H (54) | 0.97 (4)  |
| C (6)  | C (7)  | 1.506 (5) |
| C (6)  | H (55) | 0.88 (3)  |
| C (7)  | H (56) | 1.03 (3)  |
| C (7)  | H (57) | 0.96 (3)  |
| C (9)  | C (36) | 1.526 (5) |
| C (9)  | C (30) | 1.541 (5) |
| C (11) | C (12) | 1.398 (5) |
| C (11) | C (16) | 1.402 (5) |
| C (12) | C (13) | 1.386 (5) |
| C (13) | C (14) | 1.398 (5) |
| C (13) | C (44) | 1.501 (5) |
| C (14) | C (15) | 1.372 (5) |
| C (15) | C (16) | 1.409 (5) |
| C (15) | H (58) | 1.00 (3)  |
| C (17) | C (24) | 1.519 (5) |
| C (17) | C (18) | 1.525 (5) |
| C (17) | H (59) | 1.01 (4)  |
| C (18) | C (19) | 1.377 (5) |
| C (18) | C (23) | 1.381 (6) |
| C (19) | C (20) | 1.402 (6) |
| C (19) | H (60) | 1.01 (4)  |
| C (20) | C (21) | 1.359 (6) |
| C (20) | H (61) | 0.97 (4)  |
| C (21) | C (22) | 1.380 (6) |
| C (21) | H (62) | 1.09 (4)  |
| C (22) | C (23) | 1.404 (6) |
| C (22) | H (63) | 0.98 (4)  |
| C (23) | H (64) | 0.99 (5)  |
| C (24) | C (25) | 1.393 (5) |
| C (24) | C (29) | 1.400 (5) |
| C (25) | C (26) | 1.390 (6) |
| C (25) | H (65) | 0.98 (4)  |
| C (26) | C (27) | 1.368 (6) |
| C (26) | H (66) | 0.86 (4)  |
| C (27) | C (28) | 1.402 (6) |
| C (27) | H (67) | 1.04 (4)  |
| C (28) | C (29) | 1.374 (5) |
| C (28) | H (68) | 0.94 (4)  |
| C (29) | H (69) | 0.88 (4)  |
| C (30) | C (31) | 1.386 (5) |
| C (30) | C (35) | 1.398 (5) |
| C (31) | C (32) | 1.389 (5) |
| C (31) | H (70) | 0.97 (3)  |
| C (32) | C (33) | 1.388 (5) |

*Johnston et al.*

*Supporting Information II*

|        |        |           |
|--------|--------|-----------|
| C (32) | H (71) | 0.96 (4)  |
| C (33) | C (34) | 1.379 (5) |
| C (33) | H (72) | 1.02 (3)  |
| C (34) | C (35) | 1.379 (5) |
| C (34) | H (73) | 1.03 (4)  |
| C (35) | H (74) | 0.93 (4)  |
| C (36) | C (37) | 1.382 (5) |
| C (36) | C (41) | 1.382 (5) |
| C (37) | C (38) | 1.413 (5) |
| C (37) | H (75) | 1.00 (3)  |
| C (38) | C (39) | 1.378 (6) |
| C (38) | H (76) | 1.05 (4)  |
| C (39) | C (40) | 1.380 (6) |
| C (39) | H (77) | 0.99 (4)  |
| C (40) | C (41) | 1.385 (5) |
| C (40) | H (78) | 0.91 (3)  |
| C (41) | H (79) | 0.98 (3)  |
| C (43) | H (80) | 0.92 (3)  |
| C (43) | H (81) | 1.08 (4)  |
| C (43) | H (82) | 1.03 (3)  |
| C (44) | H (83) | 1.02 (4)  |
| C (44) | H (84) | 0.96 (4)  |
| C (44) | H (85) | 0.96 (4)  |
| C (46) | C (48) | 1.479 (5) |
| C (48) | C (53) | 1.387 (5) |
| C (48) | C (49) | 1.399 (5) |
| C (49) | C (50) | 1.392 (5) |
| C (49) | H (86) | 0.97 (4)  |
| C (50) | C (51) | 1.371 (5) |
| C (50) | H (87) | 0.93 (3)  |
| C (51) | C (52) | 1.385 (5) |
| C (51) | H (88) | 0.93 (4)  |
| C (52) | C (53) | 1.380 (5) |
| C (52) | H (89) | 0.95 (4)  |
| C (53) | H (90) | 0.98 (3)  |

**Table 4.** Bond Angles (°) for **12**

| A      | B      | C      | Angle     |
|--------|--------|--------|-----------|
| C (11) | O (10) | C (9)  | 119.8 (3) |
| C (12) | O (42) | C (43) | 112.1 (3) |
| C (46) | O (45) | C (14) | 115.3 (3) |
| C (6)  | N (5)  | C (17) | 114.8 (3) |
| C (6)  | N (5)  | C (4)  | 59.9 (2)  |
| C (17) | N (5)  | C (4)  | 113.3 (3) |
| C (3)  | N (8)  | C (9)  | 122.5 (3) |
| C (3)  | N (8)  | C (7)  | 114.4 (3) |
| C (9)  | N (8)  | C (7)  | 122.5 (3) |
| C (3)  | C (2)  | C (16) | 131.2 (3) |
| C (3)  | C (2)  | C1 (1) | 114.8 (3) |
| C (16) | C (2)  | C1 (1) | 113.9 (3) |
| C (2)  | C (3)  | N (8)  | 129.6 (3) |
| C (2)  | C (3)  | C (4)  | 124.2 (3) |
| N (8)  | C (3)  | C (4)  | 106.2 (3) |
| C (6)  | C (4)  | C (3)  | 107.9 (3) |
| C (6)  | C (4)  | N (5)  | 58.5 (2)  |
| C (3)  | C (4)  | N (5)  | 110.9 (3) |
| C (6)  | C (4)  | H (54) | 132 (2)   |
| C (3)  | C (4)  | H (54) | 114 (2)   |
| N (5)  | C (4)  | H (54) | 121 (2)   |
| N (5)  | C (6)  | C (4)  | 61.6 (2)  |

*Johnston et al.*

*Supporting Information II*

|        |        |        |            |
|--------|--------|--------|------------|
| N (5)  | C (6)  | C (7)  | 111.9 (3)  |
| C (4)  | C (6)  | C (7)  | 108.1 (3)  |
| N (5)  | C (6)  | H (55) | 118 (2)    |
| C (4)  | C (6)  | H (55) | 121 (2)    |
| C (7)  | C (6)  | H (55) | 121 (2)    |
| N (8)  | C (7)  | C (6)  | 103.2 (3)  |
| N (8)  | C (7)  | H (56) | 115.6 (18) |
| C (6)  | C (7)  | H (56) | 110.3 (18) |
| N (8)  | C (7)  | H (57) | 110.9 (19) |
| C (6)  | C (7)  | H (57) | 105.6 (19) |
| H (56) | C (7)  | H (57) | 111 (3)    |
| N (8)  | C (9)  | O (10) | 107.6 (3)  |
| N (8)  | C (9)  | C (36) | 110.4 (3)  |
| O (10) | C (9)  | C (36) | 103.0 (3)  |
| N (8)  | C (9)  | C (30) | 112.8 (3)  |
| O (10) | C (9)  | C (30) | 108.8 (3)  |
| C (36) | C (9)  | C (30) | 113.7 (3)  |
| O (10) | C (11) | C (12) | 115.7 (3)  |
| O (10) | C (11) | C (16) | 122.1 (3)  |
| C (12) | C (11) | C (16) | 121.9 (3)  |
| C (13) | C (12) | O (42) | 118.8 (3)  |
| C (13) | C (12) | C (11) | 122.7 (3)  |
| O (42) | C (12) | C (11) | 118.5 (3)  |
| C (12) | C (13) | C (14) | 114.6 (3)  |
| C (12) | C (13) | C (44) | 122.1 (4)  |
| C (14) | C (13) | C (44) | 123.2 (3)  |
| C (15) | C (14) | C (13) | 124.2 (3)  |
| C (15) | C (14) | O (45) | 117.3 (3)  |
| C (13) | C (14) | O (45) | 118.5 (3)  |
| C (14) | C (15) | C (16) | 121.1 (3)  |
| C (14) | C (15) | H (58) | 115.0 (18) |
| C (16) | C (15) | H (58) | 123.6 (19) |
| C (11) | C (16) | C (15) | 115.5 (3)  |
| C (11) | C (16) | C (2)  | 121.8 (3)  |
| C (15) | C (16) | C (2)  | 122.6 (3)  |
| N (5)  | C (17) | C (24) | 109.7 (3)  |
| N (5)  | C (17) | C (18) | 108.6 (3)  |
| C (24) | C (17) | C (18) | 110.6 (3)  |
| N (5)  | C (17) | H (59) | 112 (2)    |
| C (24) | C (17) | H (59) | 111 (2)    |
| C (18) | C (17) | H (59) | 105 (2)    |
| C (19) | C (18) | C (23) | 118.5 (4)  |
| C (19) | C (18) | C (17) | 119.6 (4)  |
| C (23) | C (18) | C (17) | 121.8 (4)  |
| C (18) | C (19) | C (20) | 120.6 (4)  |
| C (18) | C (19) | H (60) | 120 (3)    |
| C (20) | C (19) | H (60) | 119 (3)    |
| C (21) | C (20) | C (19) | 120.6 (4)  |
| C (21) | C (20) | H (61) | 123 (2)    |
| C (19) | C (20) | H (61) | 116 (2)    |
| C (20) | C (21) | C (22) | 119.8 (4)  |
| C (20) | C (21) | H (62) | 125 (2)    |
| C (22) | C (21) | H (62) | 115 (2)    |
| C (21) | C (22) | C (23) | 119.6 (4)  |
| C (21) | C (22) | H (63) | 123 (3)    |
| C (23) | C (22) | H (63) | 116 (3)    |
| C (18) | C (23) | C (22) | 120.9 (4)  |
| C (18) | C (23) | H (64) | 118 (3)    |
| C (22) | C (23) | H (64) | 120 (3)    |
| C (25) | C (24) | C (29) | 117.8 (4)  |
| C (25) | C (24) | C (17) | 120.2 (4)  |
| C (29) | C (24) | C (17) | 122.0 (3)  |
| C (26) | C (25) | C (24) | 120.2 (4)  |
| C (26) | C (25) | H (65) | 126 (2)    |
| C (24) | C (25) | H (65) | 113 (2)    |
| C (27) | C (26) | C (25) | 122.1 (4)  |
| C (27) | C (26) | H (66) | 117 (3)    |

*Johnston et al.*

*Supporting Information II*

|        |        |        |            |
|--------|--------|--------|------------|
| C (25) | C (26) | H (66) | 120 (3)    |
| C (26) | C (27) | C (28) | 117.8 (4)  |
| C (26) | C (27) | H (67) | 119 (2)    |
| C (28) | C (27) | H (67) | 123 (2)    |
| C (29) | C (28) | C (27) | 120.9 (4)  |
| C (29) | C (28) | H (68) | 128 (2)    |
| C (27) | C (28) | H (68) | 111 (2)    |
| C (28) | C (29) | C (24) | 121.1 (4)  |
| C (28) | C (29) | H (69) | 127 (3)    |
| C (24) | C (29) | H (69) | 112 (3)    |
| C (31) | C (30) | C (35) | 120.0 (4)  |
| C (31) | C (30) | C (9)  | 121.4 (3)  |
| C (35) | C (30) | C (9)  | 118.6 (3)  |
| C (30) | C (31) | C (32) | 119.5 (4)  |
| C (30) | C (31) | H (70) | 122.6 (18) |
| C (32) | C (31) | H (70) | 117.6 (18) |
| C (33) | C (32) | C (31) | 120.2 (4)  |
| C (33) | C (32) | H (71) | 118 (2)    |
| C (31) | C (32) | H (71) | 122 (2)    |
| C (34) | C (33) | C (32) | 120.2 (4)  |
| C (34) | C (33) | H (72) | 120.0 (18) |
| C (32) | C (33) | H (72) | 119.8 (18) |
| C (33) | C (34) | C (35) | 120.2 (4)  |
| C (33) | C (34) | H (73) | 122 (2)    |
| C (35) | C (34) | H (73) | 118.0 (19) |
| C (34) | C (35) | C (30) | 119.9 (4)  |
| C (34) | C (35) | H (74) | 118 (2)    |
| C (30) | C (35) | H (74) | 122 (2)    |
| C (37) | C (36) | C (41) | 119.3 (4)  |
| C (37) | C (36) | C (9)  | 122.4 (4)  |
| C (41) | C (36) | C (9)  | 118.3 (3)  |
| C (36) | C (37) | C (38) | 120.2 (4)  |
| C (36) | C (37) | H (75) | 128 (2)    |
| C (38) | C (37) | H (75) | 111 (2)    |
| C (39) | C (38) | C (37) | 119.4 (5)  |
| C (39) | C (38) | H (76) | 127 (2)    |
| C (37) | C (38) | H (76) | 113 (2)    |
| C (38) | C (39) | C (40) | 120.3 (4)  |
| C (38) | C (39) | H (77) | 119 (3)    |
| C (40) | C (39) | H (77) | 120 (3)    |
| C (39) | C (40) | C (41) | 119.9 (4)  |
| C (39) | C (40) | H (78) | 117.6 (19) |
| C (41) | C (40) | H (78) | 122 (2)    |
| C (36) | C (41) | C (40) | 120.9 (4)  |
| C (36) | C (41) | H (79) | 122.3 (18) |
| C (40) | C (41) | H (79) | 116.6 (18) |
| O (42) | C (43) | H (80) | 110 (2)    |
| O (42) | C (43) | H (81) | 106 (2)    |
| H (80) | C (43) | H (81) | 111 (3)    |
| O (42) | C (43) | H (82) | 108.3 (19) |
| H (80) | C (43) | H (82) | 116 (3)    |
| H (81) | C (43) | H (82) | 104 (3)    |
| C (13) | C (44) | H (83) | 109 (2)    |
| C (13) | C (44) | H (84) | 114 (2)    |
| H (83) | C (44) | H (84) | 111 (3)    |
| C (13) | C (44) | H (85) | 108 (2)    |
| H (83) | C (44) | H (85) | 103 (3)    |
| H (84) | C (44) | H (85) | 111 (3)    |
| O (47) | C (46) | O (45) | 122.6 (4)  |
| O (47) | C (46) | C (48) | 124.4 (4)  |
| O (45) | C (46) | C (48) | 112.9 (3)  |
| C (53) | C (48) | C (49) | 120.3 (4)  |
| C (53) | C (48) | C (46) | 118.4 (3)  |
| C (49) | C (48) | C (46) | 121.3 (4)  |
| C (50) | C (49) | C (48) | 117.8 (4)  |
| C (50) | C (49) | H (86) | 120 (2)    |
| C (48) | C (49) | H (86) | 122 (2)    |

Johnston *et al.*

Supporting Information II

|        |        |        |            |
|--------|--------|--------|------------|
| C (51) | C (50) | C (49) | 121.6 (4)  |
| C (51) | C (50) | H (87) | 123 (2)    |
| C (49) | C (50) | H (87) | 116 (2)    |
| C (50) | C (51) | C (52) | 120.4 (4)  |
| C (50) | C (51) | H (88) | 121 (2)    |
| C (52) | C (51) | H (88) | 118 (2)    |
| C (53) | C (52) | C (51) | 119.0 (4)  |
| C (53) | C (52) | H (89) | 123 (2)    |
| C (51) | C (52) | H (89) | 118 (2)    |
| C (52) | C (53) | C (48) | 120.9 (4)  |
| C (52) | C (53) | H (90) | 119.7 (19) |
| C (48) | C (53) | H (90) | 119.4 (19) |

**Table 5.** Torsional Angles (°) for **12**

| A      | B      | C      | D      | Torsion Angle |
|--------|--------|--------|--------|---------------|
| C (16) | C (2)  | C (3)  | N (8)  | -0.3 (7)      |
| C1 (1) | C (2)  | C (3)  | N (8)  | -177.2 (3)    |
| C (16) | C (2)  | C (3)  | C (4)  | 179.9 (4)     |
| C1 (1) | C (2)  | C (3)  | C (4)  | 3.0 (5)       |
| C (9)  | N (8)  | C (3)  | C (2)  | 14.8 (6)      |
| C (7)  | N (8)  | C (3)  | C (2)  | -174.3 (4)    |
| C (9)  | N (8)  | C (3)  | C (4)  | -165.4 (3)    |
| C (7)  | N (8)  | C (3)  | C (4)  | 5.5 (4)       |
| C (2)  | C (3)  | C (4)  | C (6)  | 177.6 (3)     |
| N (8)  | C (3)  | C (4)  | C (6)  | -2.2 (4)      |
| C (2)  | C (3)  | C (4)  | N (5)  | -120.1 (4)    |
| N (8)  | C (3)  | C (4)  | N (5)  | 60.0 (4)      |
| C (17) | N (5)  | C (4)  | C (6)  | -106.2 (3)    |
| C (6)  | N (5)  | C (4)  | C (3)  | -98.7 (3)     |
| C (17) | N (5)  | C (4)  | C (3)  | 155.1 (3)     |
| C (17) | N (5)  | C (6)  | C (4)  | 103.6 (3)     |
| C (17) | N (5)  | C (6)  | C (7)  | -157.0 (3)    |
| C (4)  | N (5)  | C (6)  | C (7)  | 99.4 (4)      |
| C (3)  | C (4)  | C (6)  | N (5)  | 104.0 (3)     |
| C (3)  | C (4)  | C (6)  | C (7)  | -1.6 (4)      |
| N (5)  | C (4)  | C (6)  | C (7)  | -105.6 (3)    |
| C (3)  | N (8)  | C (7)  | C (6)  | -6.3 (4)      |
| C (9)  | N (8)  | C (7)  | C (6)  | 164.6 (3)     |
| N (5)  | C (6)  | C (7)  | N (8)  | -61.5 (4)     |
| C (4)  | C (6)  | C (7)  | N (8)  | 4.5 (4)       |
| C (3)  | N (8)  | C (9)  | O (10) | -54.4 (4)     |
| C (7)  | N (8)  | C (9)  | O (10) | 135.5 (3)     |
| C (3)  | N (8)  | C (9)  | C (36) | -166.0 (3)    |
| C (7)  | N (8)  | C (9)  | C (36) | 23.8 (5)      |
| C (3)  | N (8)  | C (9)  | C (30) | 65.6 (4)      |
| C (7)  | N (8)  | C (9)  | C (30) | -104.5 (4)    |
| C (11) | O (10) | C (9)  | N (8)  | 86.3 (4)      |
| C (11) | O (10) | C (9)  | C (36) | -157.1 (3)    |
| C (11) | O (10) | C (9)  | C (30) | -36.2 (4)     |
| C (9)  | O (10) | C (11) | C (12) | 126.6 (3)     |
| C (9)  | O (10) | C (11) | C (16) | -59.7 (5)     |
| C (43) | O (42) | C (12) | C (13) | -96.5 (4)     |
| C (43) | O (42) | C (12) | C (11) | 83.5 (4)      |
| O (10) | C (11) | C (12) | C (13) | 171.8 (3)     |
| C (16) | C (11) | C (12) | C (13) | -1.9 (6)      |
| O (10) | C (11) | C (12) | O (42) | -8.3 (5)      |
| C (16) | C (11) | C (12) | O (42) | 178.0 (3)     |
| O (42) | C (12) | C (13) | C (14) | 179.9 (3)     |
| C (11) | C (12) | C (13) | C (14) | -0.2 (6)      |
| O (42) | C (12) | C (13) | C (44) | 1.8 (6)       |
| C (11) | C (12) | C (13) | C (44) | -178.2 (4)    |
| C (12) | C (13) | C (14) | C (15) | 2.2 (6)       |
| C (44) | C (13) | C (14) | C (15) | -179.7 (4)    |
| C (12) | C (13) | C (14) | O (45) | -178.6 (3)    |

*Johnston et al.*

*Supporting Information II*

|        |        |        |        |            |
|--------|--------|--------|--------|------------|
| C (44) | C (13) | C (14) | O (45) | -0.5 (6)   |
| C (46) | O (45) | C (14) | C (15) | -106.4 (4) |
| C (46) | O (45) | C (14) | C (13) | 74.3 (4)   |
| C (13) | C (14) | C (15) | C (16) | -2.2 (6)   |
| O (45) | C (14) | C (15) | C (16) | 178.6 (3)  |
| O (10) | C (11) | C (16) | C (15) | -171.3 (3) |
| C (12) | C (11) | C (16) | C (15) | 2.0 (6)    |
| O (10) | C (11) | C (16) | C (2)  | 5.9 (6)    |
| C (12) | C (11) | C (16) | C (2)  | 179.2 (4)  |
| C (14) | C (15) | C (16) | C (11) | 0.0 (6)    |
| C (14) | C (15) | C (16) | C (2)  | -177.2 (4) |
| C (3)  | C (2)  | C (16) | C (11) | 11.3 (6)   |
| C1 (1) | C (2)  | C (16) | C (11) | -171.7 (3) |
| C (3)  | C (2)  | C (16) | C (15) | -171.7 (4) |
| C1 (1) | C (2)  | C (16) | C (15) | 5.3 (5)    |
| C (6)  | N (5)  | C (17) | C (24) | 78.2 (4)   |
| C (4)  | N (5)  | C (17) | C (24) | 144.5 (3)  |
| C (6)  | N (5)  | C (17) | C (18) | -160.8 (3) |
| C (4)  | N (5)  | C (17) | C (18) | -94.5 (4)  |
| N (5)  | C (17) | C (18) | C (19) | 154.2 (4)  |
| C (24) | C (17) | C (18) | C (19) | -85.4 (5)  |
| N (5)  | C (17) | C (18) | C (23) | -30.5 (6)  |
| C (24) | C (17) | C (18) | C (23) | 90.0 (5)   |
| C (23) | C (18) | C (19) | C (20) | 0.8 (7)    |
| C (17) | C (18) | C (19) | C (20) | 176.4 (4)  |
| C (18) | C (19) | C (20) | C (21) | -1.0 (8)   |
| C (19) | C (20) | C (21) | C (22) | 0.6 (8)    |
| C (20) | C (21) | C (22) | C (23) | 0.0 (8)    |
| C (19) | C (18) | C (23) | C (22) | -0.3 (8)   |
| C (17) | C (18) | C (23) | C (22) | -175.7 (4) |
| C (21) | C (22) | C (23) | C (18) | -0.1 (8)   |
| N (5)  | C (17) | C (24) | C (25) | -146.1 (3) |
| C (18) | C (17) | C (24) | C (25) | 94.1 (4)   |
| N (5)  | C (17) | C (24) | C (29) | 35.9 (5)   |
| C (18) | C (17) | C (24) | C (29) | -83.9 (4)  |
| C (29) | C (24) | C (25) | C (26) | -2.9 (6)   |
| C (17) | C (24) | C (25) | C (26) | 179.1 (4)  |
| C (24) | C (25) | C (26) | C (27) | 1.7 (6)    |
| C (25) | C (26) | C (27) | C (28) | 0.0 (6)    |
| C (26) | C (27) | C (28) | C (29) | -0.3 (6)   |
| C (27) | C (28) | C (29) | C (24) | -1.0 (6)   |
| C (25) | C (24) | C (29) | C (28) | 2.6 (6)    |
| C (17) | C (24) | C (29) | C (28) | -179.4 (4) |
| N (8)  | C (9)  | C (30) | C (31) | 3.6 (5)    |
| O (10) | C (9)  | C (30) | C (31) | 122.9 (4)  |
| C (36) | C (9)  | C (30) | C (31) | -123.0 (4) |
| N (8)  | C (9)  | C (30) | C (35) | -176.0 (3) |
| O (10) | C (9)  | C (30) | C (35) | -56.7 (4)  |
| C (36) | C (9)  | C (30) | C (35) | 57.4 (5)   |
| C (35) | C (30) | C (31) | C (32) | 1.6 (6)    |
| C (9)  | C (30) | C (31) | C (32) | -178.0 (4) |
| C (30) | C (31) | C (32) | C (33) | -2.7 (6)   |
| C (31) | C (32) | C (33) | C (34) | 1.6 (6)    |
| C (32) | C (33) | C (34) | C (35) | 0.8 (6)    |
| C (33) | C (34) | C (35) | C (30) | -1.9 (6)   |
| C (31) | C (30) | C (35) | C (34) | 0.8 (6)    |
| C (9)  | C (30) | C (35) | C (34) | -179.6 (4) |
| N (8)  | C (9)  | C (36) | C (37) | -104.6 (4) |
| O (10) | C (9)  | C (36) | C (37) | 140.7 (4)  |
| C (30) | C (9)  | C (36) | C (37) | 23.3 (5)   |
| N (8)  | C (9)  | C (36) | C (41) | 74.5 (4)   |
| O (10) | C (9)  | C (36) | C (41) | -40.1 (4)  |
| C (30) | C (9)  | C (36) | C (41) | -157.6 (3) |
| C (41) | C (36) | C (37) | C (38) | 1.9 (6)    |
| C (9)  | C (36) | C (37) | C (38) | -179.0 (4) |
| C (36) | C (37) | C (38) | C (39) | -0.1 (7)   |
| C (37) | C (38) | C (39) | C (40) | -1.0 (7)   |

*Johnston et al.*

*Supporting Information II*

|        |        |        |        |            |
|--------|--------|--------|--------|------------|
| C (38) | C (39) | C (40) | C (41) | 0.3 (7)    |
| C (37) | C (36) | C (41) | C (40) | -2.6 (6)   |
| C (9)  | C (36) | C (41) | C (40) | 178.2 (3)  |
| C (39) | C (40) | C (41) | C (36) | 1.5 (6)    |
| C (14) | O (45) | C (46) | O (47) | 4.2 (5)    |
| C (14) | O (45) | C (46) | C (48) | -176.5 (3) |
| O (47) | C (46) | C (48) | C (53) | 7.8 (6)    |
| O (45) | C (46) | C (48) | C (53) | -171.5 (3) |
| O (47) | C (46) | C (48) | C (49) | -170.0 (4) |
| O (45) | C (46) | C (48) | C (49) | 10.7 (5)   |
| C (53) | C (48) | C (49) | C (50) | -0.3 (6)   |
| C (46) | C (48) | C (49) | C (50) | 177.5 (3)  |
| C (48) | C (49) | C (50) | C (51) | -0.1 (6)   |
| C (49) | C (50) | C (51) | C (52) | 0.3 (6)    |
| C (50) | C (51) | C (52) | C (53) | 0.1 (6)    |
| C (51) | C (52) | C (53) | C (48) | -0.5 (6)   |
| C (49) | C (48) | C (53) | C (52) | 0.6 (6)    |
| C (46) | C (48) | C (53) | C (52) | -177.2 (4) |

**Table 6.** Summary of X-Ray Crystallographic Data for **12**

|                                                |                                                                 |
|------------------------------------------------|-----------------------------------------------------------------|
| Empirical Formula                              | C <sub>46</sub> H <sub>37</sub> ClN <sub>2</sub> O <sub>4</sub> |
| Color of Crystal:                              | colorless                                                       |
| Crystal Dimensions were:                       | 0.40 x 0.05 x 0.03 mm.                                          |
| Space Group:                                   | P2 (1) /c                                                       |
| Cell Dimensions (at 121(2) K; 868 reflections) |                                                                 |
| a =                                            | 12.104 (3)                                                      |
| b =                                            | 18.720 (4)                                                      |
| c =                                            | 16.171 (4)                                                      |
| alpha =                                        | 90                                                              |
| beta =                                         | 92.131 (6)                                                      |
| gamma =                                        | 90                                                              |
| Z (Molecules/cell):                            | 4                                                               |
| Volume:                                        | 3661.6 (15)                                                     |
| Calculated Density:                            | 1.301                                                           |
| Wavelength:                                    | 0.71073                                                         |
| Molecular Weight:                              | 717.23                                                          |
| F(000):                                        | 1504                                                            |
| Linear Absorption Coefficient:                 | 0.153                                                           |
